# Supplementary material for: Two unique biological response-modifier glucans beneficially regulating gut microbiota and faecal metabolome in a non-alcoholic steatohepatitis animal model, with potential applications in human health and disease
Source: PubMed Central journal article supplement — BMJ Open Gastroenterol. 2022 Sep 27;9(1):e000985. doi: 10.1136/bmjgast-2022-000985 (PMC9516208; doi:10.1136/bmjgast-2022-000985), 2022-09-27
Supplement: bmjgast-2022-000985supp002.pdf [file bmjgast-2022-000985supp002.pdf]

**Supplementary Tables****Supplementary Table 1: Abundance of all the bacteria analysed at baseline and post-intervention**

| Order               | Family                 | Genus           | Species       | Contr ol (Pre) | Contr ol (Post) | AFO-202 (Pre) | AFO-202 (Post) | N-163 (Pre) | N-163 (Post) | AFO-202+N-163 (Pre) | AFO-202+N-163 (Post) | Telmisarta n (Pre) | Telmisarta n (Post) |
|---------------------|------------------------|-----------------|---------------|----------------|-----------------|---------------|----------------|-------------|--------------|---------------------|----------------------|--------------------|---------------------|
| 'Erysipelotrichales | 'Erysipelotrichaceae   | 'Allobaculum    | '_            | 12083          | 8007            | 15713         | 6542           | 4491        | 7214         | 9897                | 4360                 | 6375               | 622                 |
| 'Turicibacterales   | 'Turicibacteraceae     | 'Turicibacter   | '_            | 12538          | 3346            | 6159          | 2749           | 1470<br>2   | 2976         | 9032                | 630                  | 9408               | 786                 |
| 'Desulfovibrionales | 'Desulfovibrionaceae   | '_              | '_            | 306            | 8016            | 1398          | 10096          | 1070        | 7145         | 2351                | 3790                 | 3882               | 6012                |
| 'Clostridiales      | 'Clostridiaceae        | 'Other          | 'Other        | 7455           | 3479            | 3689          | 2806           | 8626        | 4410         | 4842                | 661                  | 7143               | 723                 |
| 'Lactobacillales    | 'Lactobacillaceae      | 'Lactobacillus  | '_            | 8555           | 11554           | 3433          | 5804           | 1056        | 2815         | 178                 | 3824                 | 416                | 254                 |
| 'Lactobacillales    | 'Streptococcaceae      | 'Lactococcus    | '_            | 5038           | 1081            | 2755          | 2146           | 4802        | 5395         | 2440                | 2577                 | 2239               | 1948                |
| 'Bacteroidales      | 'Bacteroidaceae        | 'Bacteroides    | '_            | 1091           | 1562            | 1707          | 2831           | 2262        | 1319         | 2690                | 2355                 | 1596               | 8412                |
| 'Bacteroidales      | '[Paraprevotellaceae]  | '[Prevotella]   | '_            | 962            | 540             | 1777          | 1865           | 1572        | 3708         | 3086                | 1520                 | 1674               | 7582                |
| 'Clostridiales      | '_                     | '_              | '_            | 17             | 5265            | 680           | 5964           | 620         | 837          | 1655                | 988                  | 1552               | 6029                |
| 'Deferribacterales  | 'Deferribacteraceae    | 'Mucispirillum  | 'schaedleri   | 36             | 2087            | 1486          | 1644           | 205         | 2449         | 2438                | 832                  | 4795               | 1921                |
| 'Bacteroidales      | 'Bacteroidaceae        | 'Bacteroides    | 'acidifaciens | 322            | 2633            | 781           | 2161           | 988         | 2498         | 1623                | 2156                 | 983                | 2571                |
| 'Clostridiales      | '_                     | '_              | '_            | 497            | 1386            | 760           | 1478           | 365         | 372          | 2325                | 1398                 | 853                | 2764                |
| 'Verrucomicrobiales | 'Verrucomicrobiaceae   | 'Akkermansia    | 'muciniphila  | 2151           | 0               | 1963          | 746            | 186         | 0            | 2422                | 0                    | 2305               | 320                 |
| 'Bacteroidales      | 'Rikenellaceae         | '_              | '_            | 475            | 616             | 849           | 769            | 1096        | 2251         | 1147                | 972                  | 696                | 1175                |
| 'Enterobacteriales  | 'Enterobacteriaceae    | 'Other          | 'Other        | 0              | 100             | 5             | 0              | 43          | 96           | 17                  | 9682                 | 17                 | 40                  |
| 'Lactobacillales    | 'Lactobacillaceae      | 'Lactobacillus  | '_            | 1729           | 594             | 1119          | 459            | 1351        | 1409         | 625                 | 859                  | 883                | 513                 |
| 'Bacteroidales      | 'S24-7                 | '_              | '_            | 592            | 494             | 953           | 796            | 1207        | 1046         | 676                 | 1770                 | 625                | 411                 |
| 'Clostridiales      | 'Lachnospiraceae       | '_              | '_            | 149            | 826             | 914           | 1194           | 868         | 861          | 553                 | 899                  | 752                | 1545                |
| 'Clostridiales      | 'Peptostreptococcaceae | '_              | '_            | 1705           | 1344            | 7             | 691            | 1190        | 579          | 1287                | 310                  | 1121               | 181                 |
| 'Clostridiales      | 'Lachnospiraceae       | '[Ruminococcus] | 'gnavus       | 1015           | 582             | 1118          | 398            | 617         | 167          | 1002                | 466                  | 2041               | 898                 |
| 'Clostridiales      | 'Lachnospiraceae       | 'Coprococcus    | '_            | 90             | 708             | 955           | 1191           | 873         | 917          | 448                 | 991                  | 444                | 1468                |

|                     |                      |                  |               |      |      |      |      |      |      |      |      |      |      |
|---------------------|----------------------|------------------|---------------|------|------|------|------|------|------|------|------|------|------|
| 'Bifidobacteriales  | 'Bifidobacteriaceae  | 'Bifidobacterium | 'pseudolongum | 711  | 180  | 1236 | 374  | 2092 | 602  | 671  | 82   | 1317 | 111  |
| 'Enterobacteriales  | 'Enterobacteriaceae  | 'Proteus         | '_            | 14   | 1432 | 42   | 520  | 48   | 1123 | 157  | 2722 | 0    | 1153 |
| 'Lactobacillales    | 'Lactobacillaceae    | 'Lactobacillus   | 'Other        | 1456 | 2494 | 362  | 844  | 140  | 579  | 55   | 854  | 64   | 111  |
| 'Bacteroidales      | 'S24-7               | '_               | '_            | 442  | 819  | 804  | 555  | 993  | 722  | 575  | 784  | 740  | 329  |
| 'Bacteroidales      | 'Porphyromonadaceae  | 'Parabacteroides | 'distasonis   | 111  | 699  | 194  | 700  | 361  | 689  | 330  | 585  | 320  | 1437 |
| 'Clostridiales      | 'Clostridiaceae      | '_               | '_            | 389  | 387  | 384  | 572  | 1317 | 521  | 384  | 103  | 1242 | 79   |
| 'Clostridiales      | '_                   | '_               | '_            | 41   | 998  | 289  | 1118 | 98   | 839  | 392  | 421  | 420  | 536  |
| 'Desulfovibrionales | 'Desulfovibrionaceae | 'Desulfovibrio   | '_            | 0    | 734  | 8    | 739  | 21   | 1998 | 142  | 850  | 65   | 503  |
| 'Bacteroidales      | 'S24-7               | '_               | '_            | 331  | 155  | 629  | 495  | 423  | 1087 | 551  | 327  | 708  | 271  |
| 'Coriobacteriales   | 'Coriobacteriaceae   | 'Adlercreutzia   | '_            | 1261 | 399  | 411  | 280  | 545  | 387  | 456  | 388  | 625  | 135  |
| 'Bacteroidales      | 'S24-7               | '_               | '_            | 216  | 471  | 457  | 163  | 831  | 341  | 827  | 530  | 480  | 527  |
| 'Erysipelotrichales | 'Erysipelotrichaceae | 'Clostridium     | 'cocleatum    | 0    | 519  | 95   | 1185 | 480  | 828  | 52   | 587  | 319  | 696  |
| 'Clostridiales      | 'Ruminococcaceae     | 'Ruminococcus    | '_            | 532  | 50   | 1331 | 257  | 313  | 12   | 650  | 172  | 1164 | 266  |
| 'Clostridiales      | '_                   | '_               | '_            | 250  | 522  | 302  | 564  | 161  | 144  | 855  | 488  | 319  | 995  |
| 'Clostridiales      | 'Lachnospiraceae     | 'Other           | 'Other        | 35   | 611  | 267  | 832  | 332  | 628  | 164  | 606  | 481  | 436  |
| 'Clostridiales      | 'Lachnospiraceae     | '[Ruminococcus]  | 'gnavus       | 238  | 0    | 1211 | 25   | 1233 | 0    | 995  | 90   | 311  | 87   |
| 'Turicibacteriales  | 'Turicibacteraceae   | 'Turicibacter    | '_            | 822  | 269  | 472  | 206  | 824  | 217  | 627  | 0    | 586  | 0    |
| 'Clostridiales      | 'Lachnospiraceae     | '_               | '_            | 119  | 119  | 46   | 119  | 721  | 1218 | 638  | 139  | 611  | 253  |
| 'Bacteroidales      | 'Bacteroidaceae      | 'Bacteroides     | '_            | 18   | 180  | 73   | 283  | 316  | 193  | 114  | 190  | 460  | 2042 |
| 'Clostridiales      | 'Ruminococcaceae     | 'Oscillospira    | '_            | 82   | 267  | 400  | 804  | 232  | 162  | 203  | 725  | 293  | 621  |
| 'Clostridiales      | 'Clostridiaceae      | 'Other           | 'Other        | 923  | 314  | 362  | 132  | 678  | 388  | 527  | 51   | 317  | 70   |
| 'Clostridiales      | 'Lachnospiraceae     | 'Roseburia       | '_            | 88   | 408  | 466  | 878  | 156  | 255  | 0    | 85   | 488  | 927  |
| 'Clostridiales      | 'Lachnospiraceae     | '_               | '_            | 66   | 461  | 386  | 658  | 285  | 100  | 349  | 348  | 338  | 698  |
| 'Bacteroidales      | 'S24-7               | '_               | '_            | 389  | 98   | 291  | 129  | 556  | 235  | 1359 | 128  | 305  | 104  |
| 'Clostridiales      | 'Lachnospiraceae     | '[Ruminococcus]  | 'gnavus       | 44   | 466  | 522  | 0    | 71   | 577  | 216  | 1253 | 123  | 126  |
| 'Clostridiales      | '_                   | '_               | '_            | 224  | 104  | 692  | 49   | 882  | 13   | 640  | 83   | 418  | 236  |
| 'Bacteroidales      | '_                   | '_               | '_            | 82   | 323  | 358  | 299  | 407  | 428  | 353  | 404  | 357  | 267  |
| 'Clostridiales      | 'Lachnospiraceae     | 'Coprococcus     | '_            | 38   | 297  | 349  | 454  | 350  | 387  | 122  | 399  | 126  | 562  |
| 'Bacteroidales      | 'S24-7               | '_               | '_            | 146  | 199  | 230  | 549  | 215  | 429  | 273  | 567  | 322  | 144  |
| 'Bacteroidales      | 'S24-7               | '_               | '_            | 153  | 340  | 338  | 131  | 411  | 262  | 379  | 297  | 237  | 410  |
| 'Clostridiales      | '_                   | '_               | '_            | 7    | 283  | 199  | 275  | 698  | 342  | 113  | 322  | 116  | 590  |

|                     |                      |                 |           |     |     |     |     |      |     |     |      |     |      |
|---------------------|----------------------|-----------------|-----------|-----|-----|-----|-----|------|-----|-----|------|-----|------|
| 'Clostridiales      | 'Lachnospiraceae     | 'Other          | 'Other    | 263 | 169 | 65  | 100 | 511  | 627 | 171 | 218  | 562 | 245  |
| 'Clostridiales      | 'Lachnospiraceae     | '[Ruminococcus] | 'gnavus   | 386 | 62  | 162 | 433 | 227  | 221 | 217 | 119  | 375 | 686  |
| 'Erysipelotrichales | 'Erysipelotrichaceae | 'Allobaculum    | '_        | 512 | 501 | 415 | 301 | 199  | 402 | 136 | 102  | 286 | 0    |
| 'Desulfovibrionales | 'Desulfovibrionaceae | 'Desulfovibrio  | 'C21_c20  | 47  | 98  | 333 | 294 | 111  | 846 | 307 | 171  | 604 | 43   |
| 'Bacteroidales      | 'S24-7               | '_              | '_        | 212 | 120 | 366 | 271 | 198  | 585 | 297 | 255  | 383 | 152  |
| 'Bacteroidales      | '_                   | '_              | '_        | 53  | 177 | 228 | 178 | 215  | 230 | 380 | 424  | 524 | 345  |
| 'Lactobacillales    | 'Streptococcaceae    | 'Lactococcus    | 'garvieae | 167 | 0   | 0   | 0   | 21   | 24  | 17  | 2375 | 11  | 8    |
| 'Clostridiales      | '_                   | '_              | '_        | 0   | 0   | 227 | 0   | 2184 | 0   | 0   | 196  | 0   | 0    |
| 'Enterobacteriales  | 'Enterobacteriaceae  | 'Proteus        | '_        | 0   | 507 | 0   | 184 | 0    | 408 | 54  | 1019 | 0   | 386  |
| 'Clostridiales      | 'Lachnospiraceae     | '_              | '_        | 76  | 103 | 760 | 0   | 387  | 303 | 55  | 25   | 44  | 786  |
| 'Bacteroidales      | 'S24-7               | '_              | '_        | 162 | 120 | 376 | 103 | 300  | 188 | 533 | 264  | 399 | 74   |
| 'Clostridiales      | 'Lachnospiraceae     | '[Ruminococcus] | 'gnavus   | 38  | 31  | 471 | 179 | 119  | 802 | 87  | 159  | 278 | 331  |
| 'Clostridiales      | '_                   | '_              | '_        | 273 | 0   | 690 | 38  | 459  | 53  | 522 | 18   | 371 | 44   |
| 'Clostridiales      | 'Clostridiaceae      | 'Clostridium    | 'Other    | 145 | 196 | 179 | 284 | 529  | 258 | 138 | 0    | 707 | 0    |
| 'Clostridiales      | 'Lachnospiraceae     | '_              | '_        | 37  | 179 | 867 | 356 | 82   | 98  | 774 | 16   | 0   | 15   |
| 'Clostridiales      | 'Clostridiaceae      | 'Other          | 'Other    | 542 | 233 | 252 | 97  | 379  | 294 | 356 | 0    | 215 | 49   |
| 'Clostridiales      | '_                   | '_              | '_        | 403 | 21  | 25  | 0   | 135  | 90  | 49  | 1299 | 313 | 54   |
| 'Clostridiales      | 'Clostridiaceae      | 'Other          | 'Other    | 726 | 281 | 307 | 127 | 276  | 149 | 209 | 0    | 255 | 57   |
| 'Bacteroidales      | 'S24-7               | '_              | '_        | 163 | 205 | 408 | 199 | 396  | 224 | 209 | 282  | 196 | 101  |
| 'Clostridiales      | 'Lachnospiraceae     | '[Ruminococcus] | 'gnavus   | 301 | 151 | 295 | 118 | 175  | 41  | 296 | 137  | 601 | 260  |
| 'Bacteroidales      | 'Bacteroidaceae      | 'Bacteroides    | '_        | 11  | 20  | 74  | 66  | 40   | 20  | 253 | 94   | 170 | 1596 |
| 'Bacteroidales      | 'S24-7               | '_              | '_        | 165 | 67  | 318 | 220 | 210  | 417 | 293 | 193  | 327 | 125  |
| 'Clostridiales      | '_                   | '_              | '_        | 264 | 0   | 754 | 39  | 401  | 46  | 443 | 10   | 323 | 36   |
| 'Clostridiales      | 'Lachnospiraceae     | '[Ruminococcus] | 'gnavus   | 310 | 177 | 363 | 58  | 305  | 88  | 241 | 323  | 120 | 281  |
| 'Clostridiales      | 'Ruminococcaceae     | 'Oscillospira   | '_        | 69  | 164 | 329 | 288 | 266  | 60  | 291 | 110  | 284 | 393  |
| 'Clostridiales      | 'Ruminococcaceae     | 'Anaerotruncus  | '_        | 38  | 112 | 189 | 113 | 198  | 62  | 429 | 268  | 638 | 122  |
| 'Burkholderiales    | 'Alcaligenaceae      | 'Sutterella     | '_        | 257 | 399 | 217 | 107 | 159  | 148 | 401 | 226  | 191 | 63   |
| 'Bacteroidales      | 'S24-7               | '_              | '_        | 169 | 83  | 368 | 85  | 188  | 133 | 439 | 222  | 394 | 54   |
| 'CW040              | 'F16                 | '_              | '_        | 510 | 117 | 0   | 0   | 0    | 253 | 161 | 532  | 329 | 229  |
| 'Clostridiales      | '_                   | '_              | '_        | 305 | 0   | 37  | 0   | 1318 | 0   | 29  | 121  | 320 | 0    |
| 'Clostridiales      | 'Other               | 'Other          | 'Other    | 456 | 360 | 0   | 170 | 312  | 151 | 369 | 0    | 276 | 0    |

|                     |                      |                 |               |     |     |     |     |     |     |     |      |     |     |
|---------------------|----------------------|-----------------|---------------|-----|-----|-----|-----|-----|-----|-----|------|-----|-----|
| 'Clostridiales      | 'Lachnospiraceae     | '[Ruminococcus] | 'gnavus       | 146 | 173 | 175 | 91  | 385 | 316 | 100 | 203  | 168 | 325 |
| 'Bacteroidales      | 'S24-7               | '_              | '_            | 206 | 0   | 230 | 0   | 356 | 110 | 427 | 78   | 476 | 153 |
| 'Bacteroidales      | 'Rikenellaceae       | '_              | '_            | 0   | 135 | 162 | 264 | 181 | 193 | 144 | 460  | 259 | 134 |
| 'Clostridiales      | 'Lachnospiraceae     | '[Ruminococcus] | 'gnavus       | 656 | 492 | 0   | 0   | 0   | 188 | 486 | 16   | 62  | 30  |
| 'Clostridiales      | 'Lachnospiraceae     | '_              | '_            | 0   | 126 | 118 | 244 | 75  | 266 | 77  | 398  | 250 | 359 |
| 'Clostridiales      | 'Clostridiaceae      | 'Other          | 'Other        | 0   | 119 | 164 | 235 | 341 | 270 | 0   | 0    | 693 | 39  |
| 'Clostridiales      | 'Lachnospiraceae     | '_              | '_            | 46  | 160 | 111 | 205 | 70  | 503 | 87  | 350  | 78  | 239 |
| 'Clostridiales      | 'Ruminococcaceae     | 'Oscillospira   | '_            | 117 | 249 | 97  | 220 | 162 | 264 | 171 | 258  | 160 | 138 |
| 'Lactobacillales    | 'Enterococcaceae     | 'Enterococcus   | '_            | 45  | 822 | 42  | 61  | 183 | 33  | 28  | 486  | 32  | 0   |
| 'Bacteroidales      | 'Rikenellaceae       | '_              | '_            | 39  | 119 | 147 | 230 | 165 | 162 | 126 | 388  | 239 | 96  |
| 'Bacteroidales      | 'S24-7               | '_              | '_            | 188 | 40  | 153 | 59  | 351 | 132 | 401 | 81   | 208 | 79  |
| 'Lactobacillales    | 'Lactobacillaceae    | 'Lactobacillus  | 'reuteri      | 517 | 428 | 157 | 340 | 92  | 0   | 0   | 81   | 0   | 0   |
| 'Bacteroidales      | 'Bacteroidaceae      | 'Bacteroides    | 'acidifaciens | 0   | 124 | 90  | 202 | 141 | 132 | 251 | 386  | 161 | 127 |
| 'Clostridiales      | 'Ruminococcaceae     | 'Oscillospira   | '_            | 75  | 51  | 162 | 204 | 98  | 14  | 83  | 237  | 202 | 451 |
| 'Enterobacteriales  | 'Enterobacteriaceae  | 'Escherichia    | 'coli         | 0   | 0   | 0   | 0   | 0   | 0   | 0   | 1574 | 0   | 0   |
| 'Clostridiales      | 'Ruminococcaceae     | 'Oscillospira   | '_            | 16  | 135 | 262 | 137 | 31  | 67  | 185 | 308  | 152 | 280 |
| 'Clostridiales      | '_                   | '_              | '_            | 117 | 29  | 236 | 17  | 288 | 12  | 312 | 42   | 228 | 254 |
| 'Bacteroidales      | 'S24-7               | '_              | '_            | 84  | 250 | 173 | 62  | 166 | 126 | 247 | 130  | 157 | 92  |
| 'Clostridiales      | '_                   | '_              | '_            | 159 | 0   | 0   | 0   | 283 | 32  | 0   | 0    | 988 | 0   |
| 'Clostridiales      | 'Other               | 'Other          | 'Other        | 11  | 230 | 149 | 27  | 98  | 39  | 57  | 109  | 463 | 251 |
| 'Clostridiales      | 'Lachnospiraceae     | '_              | '_            | 51  | 287 | 67  | 224 | 40  | 270 | 47  | 238  | 46  | 163 |
| 'Clostridiales      | 'Lachnospiraceae     | '[Ruminococcus] | 'gnavus       | 88  | 190 | 185 | 272 | 278 | 37  | 79  | 43   | 148 | 63  |
| 'Clostridiales      | 'Lachnospiraceae     | '_              | '_            | 28  | 17  | 54  | 62  | 51  | 288 | 167 | 158  | 390 | 117 |
| 'Enterobacteriales  | 'Enterobacteriaceae  | 'Klebsiella     | 'Other        | 0   | 225 | 0   | 0   | 0   | 0   | 18  | 1056 | 0   | 33  |
| 'Clostridiales      | 'Lachnospiraceae     | '_              | '_            | 11  | 51  | 105 | 99  | 77  | 364 | 105 | 229  | 76  | 187 |
| 'Enterobacteriales  | 'Enterobacteriaceae  | 'Klebsiella     | '_            | 0   | 210 | 0   | 0   | 0   | 0   | 15  | 1051 | 0   | 27  |
| 'Clostridiales      | '_                   | '_              | '_            | 11  | 32  | 491 | 61  | 37  | 226 | 48  | 128  | 0   | 261 |
| 'Lactobacillales    | 'Lactobacillaceae    | 'Lactobacillus  | '_            | 167 | 857 | 26  | 183 | 21  | 0   | 0   | 0    | 4   | 0   |
| 'Clostridiales      | 'Other               | 'Other          | 'Other        | 27  | 102 | 233 | 117 | 106 | 50  | 129 | 183  | 57  | 248 |
| 'Clostridiales      | '_                   | '_              | '_            | 0   | 176 | 114 | 243 | 100 | 0   | 191 | 213  | 209 | 0   |
| 'Erysipelotrichales | 'Erysipelotrichaceae | 'Allobaculum    | '_            | 0   | 0   | 0   | 0   | 6   | 978 | 0   | 0    | 203 | 59  |
| 'Clostridiales      | '_                   | '_              | '_            | 72  | 0   | 267 | 0   | 368 | 0   | 264 | 49   | 131 | 84  |

|                   |                     |                  |          |     |     |     |     |     |     |     |     |     |     |
|-------------------|---------------------|------------------|----------|-----|-----|-----|-----|-----|-----|-----|-----|-----|-----|
| 'Clostridiales    | 'Lachnospiraceae    | '_               | '_       | 34  | 15  | 188 | 165 | 115 | 48  | 161 | 19  | 207 | 271 |
| 'Clostridiales    | '_                  | '_               | '_       | 4   | 263 | 54  | 8   | 0   | 0   | 107 | 246 | 362 | 173 |
| 'Clostridiales    | 'Other              | 'Other           | 'Other   | 18  | 149 | 70  | 183 | 42  | 179 | 71  | 168 | 58  | 269 |
| 'Lactobacillales  | 'Lactobacillaceae   | 'Lactobacillus   | 'reuteri | 339 | 470 | 55  | 93  | 0   | 92  | 0   | 157 | 0   | 0   |
| 'Clostridiales    | 'Ruminococcaceae    | 'Oscillospira    | '_       | 40  | 77  | 88  | 244 | 78  | 0   | 123 | 123 | 158 | 273 |
| 'Clostridiales    | 'Lachnospiraceae    | '_               | '_       | 27  | 122 | 93  | 193 | 74  | 147 | 142 | 211 | 50  | 139 |
| 'Bacteroidales    | 'S24-7              | '_               | '_       | 90  | 0   | 0   | 103 | 0   | 254 | 134 | 318 | 158 | 125 |
| 'Bacteroidales    | 'S24-7              | '_               | '_       | 91  | 55  | 97  | 87  | 190 | 87  | 150 | 154 | 64  | 111 |
| 'Clostridiales    | 'Lachnospiraceae    | '_               | '_       | 22  | 31  | 69  | 45  | 109 | 64  | 257 | 54  | 315 | 119 |
| 'Bacteroidales    | 'S24-7              | '_               | '_       | 40  | 60  | 75  | 198 | 84  | 158 | 90  | 216 | 104 | 58  |
| 'Bacteroidales    | 'S24-7              | '_               | '_       | 123 | 36  | 161 | 39  | 95  | 261 | 151 | 82  | 60  | 74  |
| 'Clostridiales    | 'Lachnospiraceae    | '_               | '_       | 22  | 229 | 165 | 192 | 76  | 143 | 66  | 66  | 19  | 98  |
| 'Clostridiales    | '_                  | '_               | '_       | 22  | 40  | 18  | 109 | 12  | 39  | 50  | 370 | 28  | 376 |
| 'Coriobacteriales | 'Coriobacteriaceae  | 'Adlercreutzia   | '_       | 121 | 63  | 196 | 33  | 270 | 21  | 115 | 98  | 110 | 30  |
| 'Clostridiales    | '_                  | '_               | '_       | 43  | 53  | 83  | 95  | 287 | 0   | 74  | 101 | 200 | 118 |
| 'Clostridiales    | 'Clostridiaceae     | 'Other           | 'Other   | 100 | 0   | 0   | 0   | 362 | 211 | 330 | 47  | 0   | 0   |
| 'Turicibacterales | 'Turicibacteraceae  | 'Turicibacter    | '_       | 521 | 0   | 0   | 0   | 230 | 0   | 140 | 0   | 125 | 0   |
| 'Clostridiales    | 'Ruminococcaceae    | 'Ruminococcus    | '_       | 49  | 0   | 105 | 81  | 199 | 47  | 117 | 64  | 193 | 143 |
| 'Clostridiales    | 'Ruminococcaceae    | 'Oscillospira    | '_       | 13  | 36  | 105 | 75  | 193 | 13  | 152 | 67  | 215 | 119 |
| 'Clostridiales    | 'Dehalobacteriaceae | 'Dehalobacterium | '_       | 20  | 100 | 38  | 256 | 0   | 118 | 29  | 94  | 43  | 268 |
| 'Bacillales       | 'Staphylococcaceae  | 'Staphylococcus  | 'Other   | 177 | 88  | 72  | 81  | 156 | 109 | 35  | 89  | 110 | 34  |
| 'Bacteroidales    | 'Rikenellaceae      | '_               | '_       | 13  | 139 | 62  | 140 | 55  | 182 | 64  | 121 | 61  | 97  |
| 'Clostridiales    | 'Lachnospiraceae    | '_               | '_       | 155 | 63  | 109 | 114 | 109 | 63  | 85  | 43  | 87  | 98  |
| 'Clostridiales    | '_                  | '_               | '_       | 53  | 0   | 188 | 0   | 289 | 0   | 261 | 0   | 60  | 68  |
| 'Bacillales       | 'Staphylococcaceae  | 'Staphylococcus  | 'sciuri  | 184 | 139 | 66  | 63  | 124 | 63  | 131 | 54  | 34  | 41  |
| 'Clostridiales    | '_                  | '_               | '_       | 356 | 25  | 0   | 0   | 346 | 18  | 0   | 40  | 103 | 0   |
| 'Clostridiales    | 'Ruminococcaceae    | 'Ruminococcus    | '_       | 72  | 16  | 98  | 119 | 120 | 4   | 117 | 61  | 157 | 124 |
| 'Coriobacteriales | 'Coriobacteriaceae  | 'Adlercreutzia   | '_       | 176 | 34  | 96  | 46  | 190 | 70  | 77  | 84  | 101 | 0   |
| 'Clostridiales    | 'Ruminococcaceae    | 'Oscillospira    | '_       | 34  | 103 | 67  | 101 | 92  | 117 | 91  | 80  | 61  | 120 |
| 'Clostridiales    | 'Lachnospiraceae    | 'Clostridium     | 'Other   | 0   | 15  | 32  | 15  | 109 | 387 | 102 | 72  | 85  | 40  |
| 'Clostridiales    | 'Lachnospiraceae    | 'Coprococcus     | '_       | 56  | 69  | 92  | 61  | 65  | 58  | 67  | 145 | 151 | 85  |
| 'Desulfovibrional | 'Desulfovibrionacea | '_               | '_       | 4   | 90  | 41  | 188 | 22  | 171 | 41  | 94  | 50  | 148 |

|                     |                      |                  |            |     |     |     |     |     |     |     |     |     |     |
|---------------------|----------------------|------------------|------------|-----|-----|-----|-----|-----|-----|-----|-----|-----|-----|
| es                  | e                    |                  |            |     |     |     |     |     |     |     |     |     |     |
| 'Bacteroidales      | '_                   | '_               | '_         | 32  | 28  | 162 | 23  | 149 | 61  | 92  | 104 | 94  | 103 |
| 'Clostridiales      | 'Lachnospiraceae     | '_               | '_         | 22  | 53  | 255 | 0   | 142 | 99  | 0   | 0   | 0   | 272 |
| 'Clostridiales      | 'Dehalobacteriaceae  | 'Dehalobacterium | '_         | 0   | 98  | 34  | 203 | 33  | 80  | 24  | 86  | 41  | 239 |
| 'Coriobacteriales   | 'Coriobacteriaceae   | 'Adlercreutzia   | '_         | 108 | 52  | 127 | 63  | 214 | 20  | 79  | 83  | 90  | 0   |
| 'Clostridiales      | 'Lachnospiraceae     | '_               | '_         | 14  | 63  | 39  | 108 | 22  | 204 | 42  | 168 | 37  | 119 |
| 'Clostridiales      | 'Lachnospiraceae     | '_               | '_         | 87  | 48  | 193 | 17  | 82  | 37  | 97  | 70  | 168 | 14  |
| 'Clostridiales      | 'Ruminococcaceae     | 'Oscillospira    | '_         | 0   | 0   | 0   | 101 | 0   | 0   | 0   | 220 | 0   | 453 |
| 'Bacteroidales      | 'S24-7               | '_               | '_         | 56  | 33  | 158 | 47  | 129 | 173 | 57  | 0   | 55  | 51  |
| 'Lactobacillales    | 'Streptococcaceae    | 'Streptococcus   | '_         | 0   | 112 | 0   | 106 | 0   | 320 | 0   | 165 | 0   | 44  |
| 'Clostridiales      | 'Lachnospiraceae     | '[Ruminococcus]  | 'gnavus    | 0   | 126 | 107 | 165 | 171 | 0   | 51  | 0   | 83  | 37  |
| 'Clostridiales      | 'Lachnospiraceae     | '_               | '_         | 0   | 0   | 144 | 102 | 60  | 18  | 101 | 17  | 102 | 173 |
| 'Clostridiales      | 'Lachnospiraceae     | '_               | '_         | 50  | 11  | 158 | 17  | 88  | 11  | 133 | 4   | 231 | 10  |
| 'Coriobacteriales   | 'Coriobacteriaceae   | 'Adlercreutzia   | '_         | 142 | 26  | 59  | 19  | 160 | 49  | 84  | 76  | 74  | 8   |
| 'Clostridiales      | 'Lachnospiraceae     | '_               | '_         | 220 | 55  | 7   | 52  | 22  | 135 | 17  | 94  | 25  | 57  |
| 'Erysipelotrichales | 'Erysipelotrichaceae | 'Clostridium     | 'cocleatum | 0   | 106 | 0   | 222 | 74  | 130 | 0   | 0   | 0   | 119 |
| 'Bacteroidales      | 'S24-7               | '_               | '_         | 15  | 93  | 36  | 160 | 31  | 85  | 36  | 86  | 53  | 50  |
| 'Clostridiales      | 'Lachnospiraceae     | '_               | '_         | 7   | 64  | 40  | 61  | 18  | 156 | 38  | 142 | 27  | 81  |
| 'Bacteroidales      | 'Bacteroidaceae      | 'Bacteroides     | '_         | 0   | 0   | 0   | 0   | 0   | 0   | 77  | 31  | 55  | 468 |
| 'Clostridiales      | 'Ruminococcaceae     | 'Oscillospira    | '_         | 0   | 87  | 46  | 97  | 65  | 45  | 60  | 110 | 59  | 53  |
| 'Clostridiales      | 'Ruminococcaceae     | '_               | '_         | 21  | 81  | 41  | 139 | 27  | 91  | 38  | 67  | 41  | 72  |
| 'Clostridiales      | 'Lachnospiraceae     | 'Other           | 'Other     | 42  | 53  | 11  | 86  | 46  | 82  | 39  | 114 | 52  | 90  |
| 'Clostridiales      | 'Lachnospiraceae     | 'Dorea           | '_         | 23  | 50  | 46  | 63  | 31  | 22  | 67  | 129 | 28  | 154 |
| 'Clostridiales      | 'Lachnospiraceae     | '_               | '_         | 0   | 70  | 0   | 78  | 0   | 203 | 0   | 168 | 0   | 94  |
| 'Bacteroidales      | 'S24-7               | '_               | '_         | 34  | 0   | 130 | 29  | 120 | 0   | 74  | 42  | 168 | 0   |
| 'Clostridiales      | 'Lachnospiraceae     | '_               | '_         | 0   | 0   | 87  | 96  | 45  | 24  | 89  | 14  | 92  | 138 |
| 'Lactobacillales    | 'Lactobacillaceae    | 'Lactobacillus   | 'Other     | 107 | 83  | 148 | 189 | 52  | 0   | 0   | 0   | 0   | 0   |
| 'Clostridiales      | '_                   | '_               | '_         | 0   | 29  | 39  | 73  | 23  | 85  | 32  | 212 | 34  | 48  |
| 'Clostridiales      | 'Ruminococcaceae     | 'Oscillospira    | '_         | 24  | 0   | 95  | 52  | 80  | 0   | 108 | 0   | 99  | 101 |
| 'Bacteroidales      | 'S24-7               | '_               | '_         | 0   | 64  | 43  | 52  | 65  | 92  | 53  | 52  | 55  | 79  |
| 'Bacteroidales      | 'S24-7               | '_               | '_         | 55  | 0   | 52  | 53  | 76  | 70  | 54  | 53  | 67  | 71  |
| 'Clostridiales      | '[Mogibacteriaceae]  | '_               | '_         | 55  | 44  | 76  | 53  | 100 | 64  | 22  | 64  | 36  | 28  |

|                     |                      |                  |               |     |     |     |     |     |     |     |     |    |     |
|---------------------|----------------------|------------------|---------------|-----|-----|-----|-----|-----|-----|-----|-----|----|-----|
| 'Clostridiales      | 'Peptococcaceae      | '_               | '_            | 18  | 36  | 80  | 152 | 58  | 8   | 74  | 16  | 43 | 42  |
| 'Clostridiales      | '_                   | '_               | '_            | 42  | 0   | 42  | 0   | 312 | 8   | 43  | 23  | 13 | 40  |
| 'Clostridiales      | '_                   | '_               | '_            | 0   | 83  | 36  | 0   | 48  | 0   | 65  | 72  | 0  | 213 |
| 'Bacteroidales      | 'S24-7               | '_               | '_            | 31  | 33  | 99  | 36  | 100 | 0   | 76  | 45  | 76 | 19  |
| 'Clostridiales      | 'Ruminococcaceae     | 'Oscillospira    | '_            | 17  | 26  | 25  | 88  | 39  | 6   | 44  | 49  | 85 | 135 |
| 'Clostridiales      | 'Ruminococcaceae     | 'Oscillospira    | '_            | 15  | 4   | 110 | 14  | 95  | 0   | 76  | 45  | 97 | 53  |
| 'Clostridiales      | 'Lachnospiraceae     | '[Ruminococcus]  | 'gnavus       | 43  | 0   | 135 | 0   | 81  | 0   | 82  | 39  | 33 | 87  |
| 'Clostridiales      | 'Ruminococcaceae     | 'Oscillospira    | '_            | 15  | 33  | 35  | 100 | 53  | 93  | 26  | 35  | 57 | 42  |
| 'Lactobacillales    | 'Lactobacillaceae    | 'Lactobacillus   | 'reuteri      | 80  | 76  | 103 | 178 | 41  | 0   | 0   | 0   | 0  | 0   |
| 'Coriobacteriales   | 'Coriobacteriaceae   | 'Adlercreutzia   | '_            | 112 | 0   | 73  | 0   | 105 | 57  | 71  | 0   | 58 | 0   |
| 'Clostridiales      | 'Lachnospiraceae     | '_               | '_            | 12  | 36  | 0   | 0   | 0   | 0   | 66  | 362 | 0  | 0   |
| 'Bacteroidales      | 'S24-7               | '_               | '_            | 0   | 48  | 0   | 113 | 48  | 152 | 0   | 0   | 64 | 49  |
| 'Turicibacterales   | 'Turicibacteraceae   | 'Turicibacter    | '_            | 0   | 134 | 0   | 0   | 0   | 0   | 339 | 0   | 0  | 0   |
| 'Bacteroidales      | 'S24-7               | '_               | '_            | 0   | 128 | 0   | 53  | 62  | 139 | 0   | 0   | 45 | 41  |
| 'Bacteroidales      | 'Rikenellaceae       | '_               | '_            | 11  | 84  | 14  | 84  | 23  | 50  | 22  | 61  | 25 | 86  |
| 'Enterobacteriales  | 'Enterobacteriaceae  | 'Other           | 'Other        | 0   | 99  | 0   | 0   | 0   | 0   | 0   | 357 | 0  | 0   |
| 'Bacteroidales      | 'Rikenellaceae       | 'Other           | 'Other        | 5   | 37  | 40  | 43  | 38  | 102 | 16  | 72  | 47 | 53  |
| 'Bacteroidales      | 'Porphyromonadaceae  | 'Parabacteroides | '_            | 0   | 63  | 25  | 72  | 18  | 59  | 25  | 81  | 16 | 79  |
| 'Lactobacillales    | 'Lactobacillaceae    | 'Lactobacillus   | 'Other        | 87  | 81  | 86  | 146 | 36  | 0   | 0   | 0   | 0  | 0   |
| 'Clostridiales      | '_                   | '_               | '_            | 0   | 0   | 47  | 38  | 213 | 15  | 27  | 34  | 60 | 0   |
| 'Bacteroidales      | 'S24-7               | '_               | '_            | 13  | 22  | 53  | 73  | 29  | 45  | 47  | 78  | 27 | 45  |
| 'Bacteroidales      | 'S24-7               | '_               | '_            | 15  | 0   | 30  | 83  | 33  | 49  | 23  | 53  | 35 | 109 |
| 'Clostridiales      | '_                   | '_               | '_            | 8   | 43  | 50  | 14  | 40  | 32  | 18  | 121 | 85 | 19  |
| 'Enterobacteriales  | 'Enterobacteriaceae  | 'Klebsiella      | 'Other        | 0   | 82  | 0   | 0   | 0   | 0   | 0   | 348 | 0  | 0   |
| 'Clostridiales      | '_                   | '_               | '_            | 32  | 0   | 73  | 5   | 112 | 12  | 96  | 31  | 63 | 3   |
| 'Clostridiales      | 'Lachnospiraceae     | 'Other           | 'Other        | 8   | 24  | 65  | 67  | 32  | 0   | 18  | 23  | 48 | 137 |
| 'Clostridiales      | 'Ruminococcaceae     | 'Oscillospira    | '_            | 0   | 102 | 0   | 134 | 0   | 0   | 56  | 120 | 0  | 0   |
| 'Clostridiales      | 'Ruminococcaceae     | 'Oscillospira    | '_            | 0   | 0   | 67  | 30  | 54  | 66  | 54  | 0   | 71 | 65  |
| 'Bacteroidales      | 'Bacteroidaceae      | 'Bacteroides     | 'acidifaciens | 0   | 31  | 0   | 35  | 0   | 47  | 76  | 145 | 27 | 35  |
| 'Erysipelotrichales | 'Erysipelotrichaceae | '_               | '_            | 85  | 7   | 29  | 14  | 25  | 114 | 31  | 39  | 51 | 0   |
| 'Clostridiales      | 'Lachnospiraceae     | 'Dorea           | '_            | 18  | 6   | 0   | 15  | 92  | 44  | 18  | 30  | 98 | 74  |

|                    |                     |                 |         |     |     |    |     |     |     |    |     |    |     |
|--------------------|---------------------|-----------------|---------|-----|-----|----|-----|-----|-----|----|-----|----|-----|
| 'Enterobacteriales | 'Enterobacteriaceae | 'Enterobacter   | 'Other  | 125 | 30  | 0  | 7   | 0   | 49  | 17 | 125 | 0  | 41  |
| 'Clostridiales     | 'Ruminococcaceae    | 'Oscillospira   | '_      | 0   | 0   | 0  | 82  | 0   | 0   | 0  | 225 | 42 | 45  |
| 'Clostridiales     | 'Ruminococcaceae    | 'Other          | 'Other  | 12  | 60  | 63 | 44  | 60  | 27  | 43 | 10  | 61 | 12  |
| 'Clostridiales     | 'Ruminococcaceae    | 'Oscillospira   | '_      | 0   | 0   | 0  | 68  | 0   | 0   | 0  | 134 | 0  | 184 |
| 'Bacteroidales     | 'Rikenellaceae      | '_              | '_      | 0   | 61  | 0  | 55  | 32  | 110 | 0  | 48  | 31 | 43  |
| 'Clostridiales     | '_                  | '_              | '_      | 0   | 12  | 63 | 45  | 0   | 8   | 59 | 47  | 59 | 79  |
| 'Clostridiales     | 'Lachnospiraceae    | 'Other          | 'Other  | 0   | 0   | 0  | 0   | 0   | 0   | 0  | 0   | 98 | 273 |
| 'Clostridiales     | 'Other              | 'Other          | 'Other  | 0   | 39  | 0  | 65  | 0   | 92  | 0  | 60  | 18 | 87  |
| 'Clostridiales     | 'Ruminococcaceae    | 'Oscillospira   | '_      | 0   | 0   | 47 | 37  | 0   | 0   | 94 | 31  | 79 | 72  |
| 'Bacteroidales     | 'S24-7              | '_              | '_      | 0   | 28  | 23 | 78  | 34  | 21  | 0  | 46  | 38 | 85  |
| 'Clostridiales     | 'Lachnospiraceae    | '_              | '_      | 6   | 111 | 15 | 127 | 5   | 0   | 11 | 65  | 3  | 0   |
| 'Bacillales        | 'Staphylococcaceae  | 'Staphylococcus | '_      | 53  | 168 | 0  | 30  | 0   | 59  | 0  | 0   | 0  | 27  |
| 'Clostridiales     | '_                  | '_              | '_      | 0   | 0   | 77 | 0   | 87  | 0   | 66 | 0   | 96 | 6   |
| 'Clostridiales     | '_                  | '_              | '_      | 0   | 60  | 0  | 0   | 16  | 0   | 83 | 81  | 87 | 0   |
| 'Clostridiales     | '_                  | '_              | '_      | 0   | 0   | 0  | 219 | 0   | 0   | 0  | 0   | 0  | 101 |
| 'Clostridiales     | 'Other              | 'Other          | 'Other  | 0   | 15  | 50 | 29  | 33  | 0   | 24 | 77  | 10 | 71  |
| 'Lactobacillales   | 'Aerococcaceae      | 'Aerococcus     | '_      | 7   | 22  | 0  | 85  | 0   | 4   | 0  | 0   | 0  | 187 |
| 'Clostridiales     | 'Ruminococcaceae    | '_              | '_      | 0   | 0   | 0  | 0   | 264 | 0   | 33 | 0   | 0  | 0   |
| 'Clostridiales     | '_                  | '_              | '_      | 0   | 0   | 0  | 111 | 0   | 17  | 0  | 0   | 61 | 108 |
| 'Bacillales        | 'Staphylococcaceae  | 'Staphylococcus | '_      | 40  | 120 | 18 | 0   | 0   | 0   | 28 | 39  | 0  | 36  |
| 'Clostridiales     | 'Ruminococcaceae    | 'Oscillospira   | '_      | 19  | 14  | 31 | 71  | 25  | 0   | 55 | 36  | 0  | 26  |
| 'Clostridiales     | '_                  | '_              | '_      | 11  | 7   | 36 | 11  | 46  | 0   | 89 | 24  | 0  | 51  |
| 'Clostridiales     | 'Ruminococcaceae    | 'Ruminococcus   | '_      | 6   | 13  | 15 | 110 | 0   | 12  | 11 | 63  | 0  | 43  |
| 'RF39              | '_                  | '_              | '_      | 0   | 0   | 0  | 0   | 0   | 0   | 0  | 0   | 6  | 266 |
| 'Clostridiales     | 'Other              | 'Other          | 'Other  | 0   | 0   | 19 | 64  | 0   | 140 | 0  | 0   | 0  | 48  |
| 'Clostridiales     | 'Ruminococcaceae    | 'Oscillospira   | '_      | 12  | 0   | 86 | 63  | 39  | 0   | 15 | 25  | 30 | 0   |
| 'Clostridiales     | 'Lachnospiraceae    | '[Ruminococcus] | 'gnavus | 51  | 18  | 0  | 26  | 0   | 0   | 22 | 26  | 27 | 95  |
| 'Clostridiales     | 'Lachnospiraceae    | '_              | '_      | 0   | 65  | 0  | 48  | 0   | 101 | 0  | 46  | 0  | 0   |
| 'Clostridiales     | 'Other              | 'Other          | 'Other  | 0   | 0   | 0  | 81  | 0   | 134 | 0  | 0   | 0  | 45  |
| 'Clostridiales     | 'Ruminococcaceae    | 'Oscillospira   | '_      | 11  | 23  | 25 | 16  | 56  | 18  | 32 | 18  | 37 | 23  |
| 'Clostridiales     | '_                  | '_              | '_      | 0   | 0   | 0  | 99  | 0   | 0   | 0  | 0   | 69 | 90  |
| 'Clostridiales     | 'Other              | 'Other          | 'Other  | 38  | 46  | 0  | 67  | 0   | 41  | 21 | 17  | 0  | 11  |



|                     |                      |                  |            |    |    |    |    |    |     |    |     |     |     |
|---------------------|----------------------|------------------|------------|----|----|----|----|----|-----|----|-----|-----|-----|
| 'Clostridiales      | 'Other               | 'Other           | 'Other     | 0  | 0  | 0  | 56 | 0  | 131 | 0  | 0   | 0   | 53  |
| 'Clostridiales      | 'Other               | 'Other           | 'Other     | 0  | 0  | 40 | 0  | 0  | 36  | 35 | 0   | 68  | 57  |
| 'Clostridiales      | 'Lachnospiraceae     | 'Clostridium     | 'Other     | 0  | 18 | 0  | 0  | 0  | 78  | 0  | 38  | 0   | 101 |
| 'Clostridiales      | 'Lachnospiraceae     | '_               | '_         | 0  | 16 | 0  | 0  | 12 | 18  | 0  | 164 | 0   | 23  |
| 'Clostridiales      | 'Other               | 'Other           | 'Other     | 0  | 18 | 42 | 62 | 8  | 50  | 11 | 27  | 13  | 0   |
| 'Clostridiales      | 'Other               | 'Other           | 'Other     | 9  | 40 | 0  | 0  | 0  | 0   | 33 | 71  | 23  | 51  |
| 'Clostridiales      | 'Ruminococcaceae     | 'Oscillospira    | '_         | 0  | 0  | 20 | 62 | 14 | 0   | 17 | 50  | 25  | 38  |
| 'Desulfovibrionales | 'Desulfovibrionaceae | '_               | '_         | 0  | 0  | 0  | 54 | 0  | 62  | 0  | 44  | 23  | 42  |
| 'Clostridiales      | 'Dehalobacteriaceae  | 'Dehalobacterium | '_         | 11 | 0  | 31 | 0  | 97 | 0   | 56 | 0   | 24  | 0   |
| 'Bacteroidales      | 'Porphyromonadaceae  | 'Parabacteroides | '_         | 0  | 29 | 9  | 19 | 0  | 17  | 0  | 24  | 3   | 115 |
| 'Clostridiales      | 'Ruminococcaceae     | 'Ruminococcus    | '_         | 0  | 15 | 21 | 38 | 21 | 0   | 26 | 28  | 44  | 22  |
| 'Clostridiales      | 'Lachnospiraceae     | 'Coprococcus     | '_         | 10 | 6  | 39 | 12 | 9  | 12  | 34 | 21  | 23  | 46  |
| 'Clostridiales      | 'Ruminococcaceae     | 'Oscillospira    | '_         | 0  | 0  | 8  | 0  | 0  | 0   | 8  | 119 | 0   | 77  |
| 'Clostridiales      | 'Other               | 'Other           | 'Other     | 0  | 0  | 0  | 70 | 0  | 102 | 0  | 0   | 0   | 38  |
| 'Clostridiales      | 'Lachnospiraceae     | 'Coprococcus     | '_         | 0  | 25 | 16 | 0  | 14 | 0   | 19 | 46  | 34  | 49  |
| 'Clostridiales      | 'Ruminococcaceae     | 'Oscillospira    | '_         | 0  | 0  | 0  | 67 | 43 | 0   | 0  | 0   | 87  | 0   |
| 'Clostridiales      | 'Christensenellaceae | '_               | '_         | 49 | 8  | 0  | 15 | 3  | 10  | 45 | 19  | 37  | 9   |
| 'Bacteroidales      | 'S24-7               | '_               | '_         | 0  | 8  | 11 | 19 | 24 | 0   | 31 | 49  | 44  | 8   |
| 'Clostridiales      | 'Ruminococcaceae     | 'Oscillospira    | '_         | 0  | 0  | 0  | 54 | 43 | 0   | 0  | 0   | 95  | 0   |
| 'Clostridiales      | 'Lachnospiraceae     | 'Coprococcus     | '_         | 0  | 19 | 0  | 54 | 0  | 0   | 0  | 78  | 11  | 29  |
| 'Clostridiales      | 'Lachnospiraceae     | 'Other           | 'Other     | 0  | 0  | 0  | 0  | 82 | 102 | 0  | 0   | 0   | 0   |
| 'Lactobacillales    | 'Enterococcaceae     | 'Vagococcus      | '_         | 11 | 0  | 0  | 14 | 0  | 0   | 0  | 138 | 0   | 20  |
| 'Erysipelotrichales | 'Erysipelotrichaceae | 'Clostridium     | 'cocleatum | 0  | 28 | 0  | 61 | 0  | 42  | 0  | 0   | 16  | 34  |
| 'Clostridiales      | '_                   | '_               | '_         | 9  | 0  | 25 | 0  | 29 | 0   | 23 | 0   | 92  | 0   |
| 'Desulfovibrionales | 'Desulfovibrionaceae | 'Bilophila       | '_         | 0  | 13 | 8  | 46 | 16 | 0   | 25 | 36  | 11  | 17  |
| 'Clostridiales      | '_                   | '_               | '_         | 0  | 0  | 22 | 0  | 13 | 0   | 26 | 0   | 107 | 0   |
| 'Actinomycetales    | 'Corynebacteriaceae  | 'Corynebacterium | 'stationis | 72 | 18 | 0  | 23 | 14 | 0   | 23 | 17  | 0   | 0   |
| 'Clostridiales      | 'Lachnospiraceae     | 'Other           | 'Other     | 0  | 41 | 43 | 0  | 0  | 0   | 45 | 0   | 0   | 34  |
| 'Clostridiales      | 'Lachnospiraceae     | 'Other           | 'Other     | 0  | 27 | 0  | 26 | 0  | 0   | 0  | 21  | 0   | 82  |
| 'Clostridiales      | 'Lachnospiraceae     | '_               | '_         | 22 | 7  | 9  | 0  | 17 | 6   | 10 | 59  | 14  | 10  |

|                  |                     |                  |               |    |     |    |     |    |    |    |    |     |     |
|------------------|---------------------|------------------|---------------|----|-----|----|-----|----|----|----|----|-----|-----|
| 'Clostridiales   | 'Lachnospiraceae    | '_               | '_            | 0  | 26  | 6  | 0   | 32 | 0  | 20 | 38 | 31  | 0   |
| 'Clostridiales   | '_                  | '_               | '_            | 0  | 0   | 22 | 0   | 0  | 0  | 22 | 0  | 108 | 0   |
| 'Clostridiales   | '_                  | '_               | '_            | 0  | 0   | 0  | 67  | 0  | 0  | 0  | 0  | 0   | 84  |
| 'Clostridiales   | '_                  | '_               | '_            | 0  | 0   | 30 | 0   | 22 | 0  | 67 | 31 | 0   | 0   |
| 'Clostridiales   | 'Ruminococcaceae    | '_               | '_            | 5  | 0   | 52 | 0   | 41 | 0  | 23 | 0  | 27  | 0   |
| 'Clostridiales   | '_                  | '_               | '_            | 0  | 0   | 24 | 0   | 0  | 0  | 25 | 0  | 96  | 0   |
| 'Clostridiales   | 'Lachnospiraceae    | '_               | '_            | 0  | 0   | 54 | 0   | 0  | 0  | 0  | 0  | 90  | 0   |
| 'Clostridiales   | 'Dehalobacteriaceae | 'Dehalobacterium | '_            | 3  | 19  | 8  | 23  | 0  | 26 | 7  | 7  | 3   | 43  |
| 'Clostridiales   | 'Other              | 'Other           | 'Other        | 0  | 0   | 71 | 0   | 0  | 0  | 0  | 0  | 0   | 68  |
| 'Lactobacillales | 'Streptococcaceae   | 'Streptococcus   | 'luteciae     | 25 | 0   | 19 | 15  | 27 | 35 | 0  | 5  | 12  | 0   |
| 'Clostridiales   | '_                  | '_               | '_            | 0  | 0   | 55 | 82  | 0  | 0  | 0  | 0  | 0   | 0   |
| 'Bacteroidales   | 'S24-7              | '_               | '_            | 9  | 38  | 0  | 0   | 17 | 0  | 0  | 34 | 0   | 36  |
| 'Clostridiales   | 'Ruminococcaceae    | 'Anaerotruncus   | '_            | 0  | 13  | 7  | 23  | 0  | 25 | 19 | 19 | 6   | 11  |
| 'Clostridiales   | 'Ruminococcaceae    | 'Ruminococcus    | '_            | 0  | 0   | 63 | 0   | 33 | 0  | 16 | 0  | 10  | 0   |
| 'Clostridiales   | 'Lachnospiraceae    | 'Clostridium     | 'Other        | 0  | 0   | 0  | 0   | 0  | 96 | 0  | 0  | 26  | 0   |
| 'Clostridiales   | '_                  | '_               | '_            | 0  | 0   | 31 | 0   | 54 | 0  | 14 | 0  | 10  | 10  |
| 'Clostridiales   | 'Ruminococcaceae    | 'Oscillospira    | '_            | 0  | 6   | 13 | 18  | 19 | 0  | 18 | 11 | 11  | 22  |
| 'Clostridiales   | 'Lachnospiraceae    | 'Coprococcus     | '_            | 0  | 19  | 13 | 25  | 0  | 0  | 11 | 0  | 20  | 30  |
| 'Clostridiales   | '_                  | '_               | '_            | 20 | 12  | 39 | 0   | 0  | 0  | 32 | 0  | 12  | 0   |
| 'Bacteroidales   | 'S24-7              | '_               | '_            | 0  | 0   | 0  | 113 | 0  | 0  | 0  | 0  | 0   | 0   |
| 'Lactobacillales | 'Aerococcaceae      | 'Facklamia       | '_            | 21 | 0   | 25 | 2   | 27 | 0  | 20 | 0  | 16  | 0   |
| 'Clostridiales   | 'Lachnospiraceae    | '_               | '_            | 0  | 0   | 0  | 0   | 0  | 0  | 48 | 0  | 0   | 60  |
| 'Clostridiales   | 'Ruminococcaceae    | 'Oscillospira    | '_            | 0  | 0   | 0  | 0   | 0  | 0  | 24 | 0  | 54  | 30  |
| 'Bacteroidales   | 'S24-7              | '_               | '_            | 0  | 0   | 0  | 6   | 14 | 6  | 0  | 34 | 47  | 0   |
| 'Clostridiales   | '_                  | '_               | '_            | 0  | 0   | 0  | 0   | 0  | 0  | 0  | 0  | 0   | 107 |
| 'Clostridiales   | 'Ruminococcaceae    | 'Oscillospira    | '_            | 0  | 0   | 0  | 27  | 5  | 0  | 0  | 29 | 35  | 9   |
| 'Bacteroidales   | 'Bacteroidaceae     | 'Bacteroides     | 'acidifaciens | 0  | 105 | 0  | 0   | 0  | 0  | 0  | 0  | 0   | 0   |
| 'Bacteroidales   | 'Bacteroidaceae     | 'Bacteroides     | 'acidifaciens | 0  | 3   | 6  | 32  | 9  | 17 | 7  | 17 | 0   | 11  |
| 'Clostridiales   | 'Lachnospiraceae    | 'Dorea           | '_            | 11 | 3   | 21 | 0   | 14 | 0  | 19 | 0  | 25  | 8   |
| 'Clostridiales   | 'Ruminococcaceae    | 'Other           | 'Other        | 4  | 0   | 14 | 8   | 33 | 0  | 7  | 13 | 10  | 11  |
| 'Clostridiales   | 'Lachnospiraceae    | '_               | '_            | 0  | 0   | 80 | 0   | 0  | 0  | 0  | 0  | 7   | 13  |
| 'Clostridiales   | 'Lachnospiraceae    | '_               | '_            | 11 | 0   | 0  | 0   | 30 | 12 | 14 | 12 | 20  | 0   |

|                     |                      |                |        |    |    |    |    |    |    |    |    |    |    |
|---------------------|----------------------|----------------|--------|----|----|----|----|----|----|----|----|----|----|
| 'Bacteroidales      | 'S24-7               | '_             | '_     | 20 | 0  | 0  | 0  | 0  | 3  | 46 | 26 | 1  | 1  |
| 'Clostridiales      | 'Lachnospiraceae     | 'Other         | 'Other | 0  | 0  | 19 | 0  | 0  | 0  | 64 | 0  | 14 | 0  |
| 'Clostridiales      | '_                   | '_             | '_     | 4  | 0  | 42 | 0  | 50 | 0  | 0  | 0  | 0  | 0  |
| 'Clostridiales      | 'Ruminococcaceae     | 'Oscillospira  | '_     | 0  | 9  | 13 | 15 | 10 | 0  | 0  | 39 | 0  | 9  |
| 'Clostridiales      | 'Ruminococcaceae     | 'Oscillospira  | '_     | 0  | 0  | 0  | 0  | 21 | 0  | 32 | 0  | 42 | 0  |
| 'Clostridiales      | 'Lachnospiraceae     | '_             | '_     | 0  | 13 | 0  | 20 | 9  | 6  | 13 | 0  | 14 | 19 |
| 'Erysipelotrichales | 'Erysipelotrichaceae | '_             | '_     | 38 | 0  | 0  | 0  | 0  | 55 | 0  | 0  | 0  | 0  |
| 'Bacteroidales      | 'S24-7               | '_             | '_     | 0  | 0  | 0  | 0  | 0  | 28 | 0  | 0  | 65 | 0  |
| 'Clostridiales      | 'Lachnospiraceae     | '_             | '_     | 0  | 0  | 11 | 17 | 18 | 5  | 8  | 11 | 13 | 9  |
| 'Clostridiales      | 'Ruminococcaceae     | 'Oscillospira  | '_     | 15 | 0  | 76 | 0  | 0  | 0  | 0  | 0  | 0  | 0  |
| 'Clostridiales      | 'Lachnospiraceae     | '_             | '_     | 0  | 0  | 21 | 0  | 8  | 9  | 15 | 0  | 22 | 14 |
| 'Clostridiales      | 'Other               | 'Other         | 'Other | 0  | 0  | 0  | 0  | 0  | 0  | 40 | 0  | 49 | 0  |
| 'CW040              | 'F16                 | '_             | '_     | 0  | 0  | 66 | 18 | 0  | 0  | 0  | 0  | 0  | 0  |
| 'Clostridiales      | 'Christensenellaceae | '_             | '_     | 6  | 0  | 17 | 5  | 13 | 5  | 9  | 4  | 19 | 5  |
| 'Clostridiales      | 'Lachnospiraceae     | 'Other         | 'Other | 0  | 0  | 0  | 0  | 0  | 81 | 0  | 0  | 0  | 0  |
| 'Clostridiales      | 'Ruminococcaceae     | 'Oscillospira  | '_     | 0  | 0  | 9  | 0  | 34 | 0  | 13 | 12 | 12 | 0  |
| 'Clostridiales      | '_                   | '_             | '_     | 0  | 0  | 0  | 0  | 0  | 0  | 0  | 0  | 80 | 0  |
| 'Clostridiales      | 'Ruminococcaceae     | 'Other         | 'Other | 8  | 4  | 12 | 0  | 15 | 0  | 25 | 0  | 14 | 0  |
| 'Clostridiales      | '_                   | '_             | '_     | 0  | 0  | 19 | 0  | 58 | 0  | 0  | 0  | 0  | 0  |
| 'Clostridiales      | 'Lachnospiraceae     | 'Other         | 'Other | 15 | 0  | 0  | 18 | 0  | 0  | 0  | 43 | 0  | 0  |
| 'Clostridiales      | 'Other               | 'Other         | 'Other | 0  | 0  | 0  | 0  | 76 | 0  | 0  | 0  | 0  | 0  |
| 'Lactobacillales    | 'Enterococcaceae     | 'Vagococcus    | '_     | 29 | 0  | 0  | 0  | 0  | 0  | 20 | 0  | 0  | 26 |
| 'Clostridiales      | 'Ruminococcaceae     | 'Ruminococcus  | '_     | 14 | 0  | 9  | 0  | 8  | 0  | 6  | 11 | 23 | 0  |
| 'Erysipelotrichales | 'Erysipelotrichaceae | 'Coprobacillus | '_     | 11 | 0  | 23 | 0  | 0  | 0  | 26 | 0  | 11 | 0  |
| 'Clostridiales      | 'Other               | 'Other         | 'Other | 0  | 0  | 22 | 0  | 49 | 0  | 0  | 0  | 0  | 0  |
| 'Clostridiales      | 'Ruminococcaceae     | 'Oscillospira  | '_     | 0  | 0  | 9  | 0  | 21 | 0  | 14 | 7  | 11 | 9  |
| 'Clostridiales      | 'Ruminococcaceae     | 'Oscillospira  | '_     | 0  | 0  | 38 | 0  | 32 | 0  | 0  | 0  | 0  | 0  |
| 'Clostridiales      | '_                   | '_             | '_     | 0  | 0  | 14 | 0  | 43 | 0  | 13 | 0  | 0  | 0  |
| 'Clostridiales      | 'Lachnospiraceae     | '_             | '_     | 0  | 15 | 6  | 14 | 8  | 8  | 8  | 11 | 0  | 0  |
| 'Clostridiales      | 'Ruminococcaceae     | 'Oscillospira  | '_     | 0  | 0  | 0  | 0  | 0  | 0  | 0  | 38 | 0  | 31 |
| 'Clostridiales      | 'Lachnospiraceae     | 'Coprococcus   | '_     | 0  | 0  | 0  | 0  | 52 | 0  | 15 | 0  | 0  | 0  |
| 'Clostridiales      | 'Ruminococcaceae     | 'Other         | 'Other | 0  | 10 | 0  | 9  | 4  | 0  | 7  | 23 | 8  | 5  |

|                     |                      |                |        |    |    |    |    |    |    |    |    |    |    |
|---------------------|----------------------|----------------|--------|----|----|----|----|----|----|----|----|----|----|
| 'Clostridiales      | '_                   | '_             | '_     | 0  | 0  | 0  | 0  | 0  | 0  | 26 | 40 | 0  | 0  |
| 'Erysipelotrichales | 'Erysipelotrichaceae | '_             | '_     | 0  | 0  | 9  | 14 | 14 | 14 | 6  | 0  | 6  | 2  |
| 'Bacteroidales      | 'Rikenellaceae       | '_             | '_     | 0  | 8  | 7  | 4  | 0  | 13 | 7  | 13 | 0  | 11 |
| 'Clostridiales      | '_                   | '_             | '_     | 0  | 0  | 0  | 0  | 63 | 0  | 0  | 0  | 0  | 0  |
| 'Clostridiales      | '_                   | '_             | '_     | 0  | 0  | 0  | 0  | 0  | 0  | 21 | 0  | 0  | 40 |
| 'Clostridiales      | '_                   | '_             | '_     | 15 | 0  | 11 | 0  | 26 | 0  | 0  | 0  | 8  | 0  |
| 'Clostridiales      | 'Lachnospiraceae     | '_             | '_     | 0  | 0  | 0  | 0  | 58 | 0  | 0  | 0  | 0  | 0  |
| 'Clostridiales      | '_                   | '_             | '_     | 0  | 0  | 10 | 0  | 32 | 0  | 0  | 0  | 15 | 0  |
| 'Clostridiales      | 'Lachnospiraceae     | 'Clostridium   | 'Other | 0  | 0  | 0  | 0  | 0  | 29 | 0  | 0  | 0  | 28 |
| 'Erysipelotrichales | 'Erysipelotrichaceae | '_             | '_     | 7  | 0  | 18 | 9  | 10 | 0  | 0  | 0  | 9  | 0  |
| 'Lactobacillales    | 'Streptococcaceae    | 'Streptococcus | 'minor | 0  | 0  | 9  | 0  | 19 | 0  | 16 | 0  | 9  | 0  |
| 'Clostridiales      | 'Ruminococcaceae     | 'Oscillospira  | '_     | 0  | 0  | 0  | 0  | 53 | 0  | 0  | 0  | 0  | 0  |
| 'Clostridiales      | '_                   | '_             | '_     | 0  | 0  | 0  | 8  | 18 | 0  | 0  | 0  | 27 | 0  |
| 'Clostridiales      | 'Lachnospiraceae     | 'Other         | 'Other | 13 | 0  | 7  | 0  | 13 | 0  | 11 | 0  | 7  | 0  |
| 'Clostridiales      | 'Other               | 'Other         | 'Other | 0  | 0  | 0  | 0  | 15 | 0  | 0  | 0  | 36 | 0  |
| 'RF39               | '_                   | '_             | '_     | 0  | 0  | 0  | 0  | 50 | 0  | 0  | 0  | 0  | 0  |
| 'Clostridiales      | '_                   | '_             | '_     | 0  | 0  | 0  | 0  | 49 | 0  | 0  | 0  | 0  | 0  |
| 'Clostridiales      | '_                   | '_             | '_     | 14 | 0  | 0  | 0  | 0  | 0  | 0  | 33 | 0  | 0  |
| 'Clostridiales      | '_                   | '_             | '_     | 0  | 0  | 13 | 0  | 7  | 0  | 0  | 18 | 8  | 0  |
| 'Clostridiales      | 'Lachnospiraceae     | '_             | '_     | 0  | 11 | 0  | 0  | 0  | 7  | 7  | 0  | 7  | 12 |
| 'Lactobacillales    | 'Streptococcaceae    | 'Streptococcus | '_     | 0  | 0  | 0  | 0  | 0  | 44 | 0  | 0  | 0  | 0  |
| 'Clostridiales      | '_                   | '_             | '_     | 0  | 0  | 0  | 0  | 43 | 0  | 0  | 0  | 0  | 0  |
| 'Bacteroidales      | 'S24-7               | '_             | '_     | 0  | 0  | 0  | 0  | 0  | 0  | 0  | 43 | 0  | 0  |
| 'Clostridiales      | '_                   | '_             | '_     | 0  | 0  | 0  | 0  | 0  | 0  | 0  | 0  | 42 | 0  |
| 'Clostridiales      | 'Other               | 'Other         | 'Other | 0  | 0  | 0  | 0  | 0  | 0  | 0  | 0  | 0  | 42 |
| 'Clostridiales      | '[Mogibacteriaceae]  | '_             | '_     | 7  | 0  | 4  | 12 | 0  | 0  | 6  | 12 | 0  | 0  |
| 'Enterobacteriales  | 'Enterobacteriaceae  | 'Enterobacter  | 'Other | 13 | 0  | 0  | 0  | 0  | 0  | 0  | 27 | 0  | 0  |
| 'Clostridiales      | 'Eubacteriaceae      | 'Anaerofustis  | '_     | 0  | 2  | 15 | 0  | 13 | 0  | 0  | 4  | 5  | 0  |
| 'Erysipelotrichales | 'Erysipelotrichaceae | '_             | '_     | 0  | 0  | 0  | 0  | 15 | 0  | 5  | 0  | 0  | 19 |
| 'Lactobacillales    | 'Aerococcaceae       | 'Aerococcus    | '_     | 0  | 0  | 0  | 0  | 0  | 0  | 0  | 0  | 0  | 39 |
| 'Clostridiales      | 'Ruminococcaceae     | 'Oscillospira  | '_     | 0  | 0  | 21 | 0  | 17 | 0  | 0  | 0  | 0  | 0  |
| 'Clostridiales      | 'Ruminococcaceae     | 'Oscillospira  | '_     | 0  | 0  | 0  | 10 | 0  | 0  | 0  | 16 | 0  | 12 |

|                     |                      |                  |                  |    |    |    |    |    |   |    |    |    |    |
|---------------------|----------------------|------------------|------------------|----|----|----|----|----|---|----|----|----|----|
| 'Clostridiales      | 'Other               | 'Other           | 'Other           | 0  | 0  | 16 | 0  | 9  | 0 | 7  | 0  | 5  | 0  |
| 'Clostridiales      | '_                   | '_               | '_               | 0  | 9  | 0  | 10 | 0  | 5 | 0  | 0  | 5  | 8  |
| 'Clostridiales      | 'Lachnospiraceae     | 'Coprococcus     | '_               | 0  | 0  | 17 | 0  | 0  | 0 | 0  | 18 | 0  | 0  |
| 'Clostridiales      | 'Other               | 'Other           | 'Other           | 0  | 0  | 0  | 0  | 0  | 0 | 0  | 0  | 35 | 0  |
| 'Clostridiales      | '_                   | '_               | '_               | 0  | 0  | 33 | 0  | 0  | 0 | 0  | 0  | 0  | 0  |
| 'Clostridiales      | 'Lachnospiraceae     | 'Other           | 'Other           | 0  | 0  | 12 | 0  | 0  | 0 | 9  | 0  | 11 | 0  |
| 'Clostridiales      | 'Ruminococcaceae     | 'Oscillospira    | '_               | 0  | 0  | 8  | 14 | 0  | 0 | 0  | 10 | 0  | 0  |
| 'Bacteroidales      | 'S24-7               | '_               | '_               | 0  | 32 | 0  | 0  | 0  | 0 | 0  | 0  | 0  | 0  |
| 'Clostridiales      | 'Ruminococcaceae     | 'Ruminococcus    | '_               | 0  | 0  | 15 | 0  | 16 | 0 | 0  | 0  | 0  | 0  |
| 'Clostridiales      | 'Ruminococcaceae     | 'Oscillospira    | '_               | 0  | 0  | 0  | 0  | 0  | 0 | 0  | 0  | 31 | 0  |
| 'Clostridiales      | '_                   | '_               | '_               | 0  | 0  | 30 | 0  | 0  | 0 | 0  | 0  | 0  | 0  |
| 'Clostridiales      | '_                   | '_               | '_               | 0  | 0  | 14 | 0  | 0  | 0 | 16 | 0  | 0  | 0  |
| 'Clostridiales      | '_                   | '_               | '_               | 0  | 0  | 0  | 0  | 30 | 0 | 0  | 0  | 0  | 0  |
| 'Clostridiales      | '_                   | '_               | '_               | 0  | 0  | 0  | 8  | 6  | 0 | 0  | 0  | 16 | 0  |
| 'Clostridiales      | 'Ruminococcaceae     | 'Ruminococcus    | '_               | 0  | 12 | 0  | 8  | 0  | 0 | 0  | 10 | 0  | 0  |
| 'Clostridiales      | 'Lachnospiraceae     | '_               | '_               | 6  | 0  | 7  | 0  | 6  | 0 | 0  | 10 | 0  | 0  |
| 'Clostridiales      | 'Ruminococcaceae     | 'Oscillospira    | '_               | 0  | 0  | 14 | 0  | 0  | 0 | 15 | 0  | 0  | 0  |
| 'Clostridiales      | '_                   | '_               | '_               | 0  | 0  | 0  | 0  | 15 | 0 | 0  | 0  | 14 | 0  |
| 'Clostridiales      | '_                   | '_               | '_               | 0  | 0  | 0  | 0  | 0  | 0 | 9  | 0  | 20 | 0  |
| 'Actinomycetales    | 'Corynebacteriaceae  | 'Corynebacterium | 'stationis       | 26 | 0  | 0  | 0  | 0  | 0 | 0  | 0  | 0  | 0  |
| 'Clostridiales      | 'Ruminococcaceae     | 'Other           | 'Other           | 0  | 0  | 4  | 0  | 3  | 0 | 14 | 0  | 5  | 0  |
| 'Bacteroidales      | 'S24-7               | '_               | '_               | 0  | 0  | 0  | 0  | 0  | 0 | 0  | 13 | 0  | 13 |
| 'Clostridiales      | 'Ruminococcaceae     | 'Oscillospira    | '_               | 0  | 0  | 0  | 0  | 0  | 0 | 0  | 0  | 0  | 26 |
| 'Clostridiales      | 'Ruminococcaceae     | 'Oscillospira    | '_               | 0  | 0  | 0  | 0  | 0  | 0 | 0  | 25 | 0  | 0  |
| 'Clostridiales      | 'Ruminococcaceae     | 'Ruminococcus    | '_               | 13 | 0  | 11 | 0  | 0  | 0 | 0  | 0  | 0  | 0  |
| 'Clostridiales      | '[Mogibacteriaceae]  | '_               | '_               | 11 | 0  | 0  | 4  | 0  | 0 | 0  | 9  | 0  | 0  |
| 'Erysipelotrichales | 'Erysipelotrichaceae | 'Coprobacillus   | '_               | 0  | 0  | 0  | 0  | 14 | 0 | 10 | 0  | 0  | 0  |
| 'Erysipelotrichales | 'Erysipelotrichaceae | 'Clostridium     | 'cocleatum       | 0  | 2  | 0  | 0  | 0  | 0 | 0  | 20 | 0  | 1  |
| 'Bacteroidales      | 'S24-7               | '_               | '_               | 0  | 0  | 0  | 0  | 0  | 0 | 0  | 23 | 0  | 0  |
| 'Coriobacteriales   | 'Coriobacteriaceae   | '_               | '_               | 0  | 0  | 7  | 0  | 10 | 5 | 0  | 0  | 0  | 0  |
| 'Coriobacteriales   | 'Coriobacteriaceae   | 'Adlercreutzia   | '_               | 4  | 0  | 0  | 0  | 8  | 9 | 0  | 0  | 0  | 0  |
| 'Lactobacillales    | 'Leuconostocaceae    | 'Weissella       | 'paramesenteroid | 2  | 0  | 0  | 3  | 0  | 0 | 4  | 0  | 0  | 12 |

|                     |                      |                     | es            |    |    |    |    |    |    |    |    |    |    |
|---------------------|----------------------|---------------------|---------------|----|----|----|----|----|----|----|----|----|----|
| 'Lactobacillales    | 'Enterococcaceae     | 'Vagococcus         | '_            | 0  | 0  | 0  | 0  | 21 | 0  | 0  | 0  | 0  | 0  |
| 'Clostridiales      | 'Ruminococcaceae     | 'Butyricicoccus     | 'pullicaeorum | 0  | 0  | 0  | 0  | 7  | 0  | 0  | 8  | 6  | 0  |
| 'Clostridiales      | '[Mogibacteriaceae]  | '_                  | '_            | 0  | 0  | 0  | 12 | 0  | 0  | 0  | 3  | 0  | 6  |
| 'RF39               | '_                   | '_                  | '_            | 0  | 0  | 0  | 0  | 12 | 0  | 0  | 0  | 8  | 0  |
| 'Clostridiales      | '_                   | '_                  | '_            | 0  | 0  | 0  | 0  | 0  | 0  | 0  | 0  | 20 | 0  |
| 'Clostridiales      | '_                   | '_                  | '_            | 0  | 0  | 0  | 0  | 0  | 0  | 0  | 0  | 20 | 0  |
| 'Bacteroidales      | 'S24-7               | '_                  | '_            | 0  | 0  | 0  | 9  | 0  | 0  | 0  | 0  | 0  | 11 |
| 'Clostridiales      | 'Ruminococcaceae     | 'Oscillospira       | '_            | 0  | 0  | 9  | 0  | 0  | 0  | 0  | 10 | 0  | 0  |
| 'Bacillales         | 'Planococcaceae      | 'Sporosarcina       | '_            | 0  | 8  | 0  | 0  | 3  | 3  | 4  | 0  | 0  | 0  |
| 'Clostridiales      | 'Lachnospiraceae     | 'Blautia            | 'producta     | 0  | 0  | 7  | 6  | 0  | 0  | 4  | 0  | 0  | 0  |
| 'Erysipelotrichales | 'Erysipelotrichaceae | 'Other              | 'Other        | 0  | 0  | 0  | 0  | 0  | 10 | 0  | 0  | 7  | 0  |
| 'Clostridiales      | '_                   | '_                  | '_            | 0  | 0  | 0  | 0  | 0  | 0  | 16 | 0  | 0  | 0  |
| 'Clostridiales      | 'Ruminococcaceae     | 'Ruminococcus       | '_            | 0  | 0  | 15 | 0  | 0  | 0  | 0  | 0  | 0  | 0  |
| 'Clostridiales      | '_                   | '_                  | '_            | 0  | 0  | 0  | 0  | 15 | 0  | 0  | 0  | 0  | 0  |
| 'Clostridiales      | '_                   | '_                  | '_            | 0  | 0  | 0  | 0  | 0  | 0  | 15 | 0  | 0  | 0  |
| 'Clostridiales      | '_                   | '_                  | '_            | 0  | 15 | 0  | 0  | 0  | 0  | 0  | 0  | 0  | 0  |
| 'Coriobacteriales   | 'Coriobacteriaceae   | 'Adlercreutzia      | '_            | 10 | 4  | 0  | 0  | 0  | 0  | 0  | 0  | 0  | 0  |
| 'Clostridiales      | 'Other               | 'Other              | 'Other        | 0  | 0  | 0  | 0  | 0  | 0  | 14 | 0  | 0  | 0  |
| 'Clostridiales      | 'Ruminococcaceae     | 'Other              | 'Other        | 0  | 5  | 0  | 9  | 0  | 0  | 0  | 0  | 0  | 0  |
| 'Erysipelotrichales | 'Erysipelotrichaceae | '_                  | '_            | 0  | 0  | 0  | 14 | 0  | 0  | 0  | 0  | 0  | 0  |
| 'Deferribacteriales | 'Deferribacteraceae  | 'Mucispirillum      | 'schaedleri   | 0  | 0  | 0  | 0  | 0  | 14 | 0  | 0  | 0  | 0  |
| 'Rhizobiales        | 'Methylobacteriaceae | 'Methylobacterium   | 'Other        | 0  | 0  | 0  | 0  | 2  | 11 | 0  | 0  | 0  | 0  |
| 'Methanobacteriales | 'Methanobacteriaceae | 'Methanobrevibacter | '_            | 0  | 0  | 0  | 0  | 0  | 13 | 0  | 0  | 0  | 0  |
| 'RF39               | '_                   | '_                  | '_            | 0  | 2  | 6  | 0  | 4  | 0  | 0  | 0  | 0  | 0  |
| 'Clostridiales      | 'Lachnospiraceae     | 'Other              | 'Other        | 0  | 0  | 0  | 0  | 0  | 0  | 0  | 0  | 12 | 0  |
| 'Clostridiales      | 'Lachnospiraceae     | 'Dorea              | '_            | 11 | 0  | 0  | 0  | 0  | 0  | 0  | 0  | 0  | 0  |
| 'Clostridiales      | 'Lachnospiraceae     | 'Dorea              | '_            | 0  | 0  | 4  | 0  | 0  | 0  | 0  | 0  | 7  | 0  |
| 'Clostridiales      | 'Lachnospiraceae     | '_                  | '_            | 0  | 0  | 0  | 0  | 0  | 0  | 0  | 0  | 11 | 0  |
| 'Erysipelotrichales | 'Erysipelotrichaceae | '_                  | '_            | 0  | 11 | 0  | 0  | 0  | 0  | 0  | 0  | 0  | 0  |
| 'Clostridiales      | '_                   | '_                  | '_            | 0  | 11 | 0  | 0  | 0  | 0  | 0  | 0  | 0  | 0  |

|                     |                      |                |            |   |   |    |   |    |   |   |    |    |    |
|---------------------|----------------------|----------------|------------|---|---|----|---|----|---|---|----|----|----|
| 'Clostridiales      | 'Other               | 'Other         | 'Other     | 0 | 0 | 0  | 0 | 0  | 0 | 0 | 11 | 0  | 0  |
| 'Clostridiales      | 'Ruminococcaceae     | 'Ruminococcus  | '_         | 0 | 0 | 0  | 0 | 0  | 0 | 0 | 0  | 0  | 11 |
| 'Clostridiales      | 'Lachnospiraceae     | 'Other         | 'Other     | 0 | 0 | 10 | 0 | 0  | 0 | 0 | 0  | 0  | 0  |
| 'Erysipelotrichales | 'Erysipelotrichaceae | 'Clostridium   | 'cocleatum | 0 | 0 | 0  | 0 | 10 | 0 | 0 | 0  | 0  | 0  |
| 'Clostridiales      | 'Clostridiaceae      | '_             | '_         | 0 | 0 | 0  | 0 | 0  | 0 | 0 | 0  | 10 | 0  |
| 'Bacteroidales      | 'S24-7               | '_             | '_         | 0 | 0 | 0  | 6 | 0  | 0 | 0 | 4  | 0  | 0  |
| 'Clostridiales      | 'Ruminococcaceae     | 'Oscillospira  | '_         | 0 | 0 | 0  | 0 | 0  | 0 | 0 | 0  | 0  | 10 |
| 'Clostridiales      | '_                   | '_             | '_         | 9 | 0 | 0  | 0 | 0  | 0 | 0 | 0  | 0  | 0  |
| 'Clostridiales      | '_                   | '_             | '_         | 0 | 0 | 0  | 0 | 9  | 0 | 0 | 0  | 0  | 0  |
| 'Erysipelotrichales | 'Erysipelotrichaceae | '_             | '_         | 0 | 0 | 0  | 0 | 0  | 0 | 0 | 0  | 0  | 9  |
| 'Lactobacillales    | 'Streptococcaceae    | '_             | '_         | 0 | 0 | 0  | 0 | 8  | 0 | 0 | 0  | 0  | 0  |
| 'Erysipelotrichales | 'Erysipelotrichaceae | '_             | '_         | 0 | 0 | 0  | 0 | 0  | 0 | 8 | 0  | 0  | 0  |
| 'Turicibacterales   | 'Turicibacteraceae   | 'Turicibacter  | '_         | 7 | 0 | 0  | 0 | 0  | 0 | 0 | 0  | 0  | 0  |
| 'Bacteroidales      | 'S24-7               | '_             | '_         | 0 | 0 | 7  | 0 | 0  | 0 | 0 | 0  | 0  | 0  |
| 'Clostridiales      | 'Ruminococcaceae     | 'Oscillospira  | '_         | 0 | 0 | 7  | 0 | 0  | 0 | 0 | 0  | 0  | 0  |
| 'Clostridiales      | 'Lachnospiraceae     | '_             | '_         | 0 | 0 | 7  | 0 | 0  | 0 | 0 | 0  | 0  | 0  |
| 'Clostridiales      | '_                   | '_             | '_         | 0 | 3 | 0  | 0 | 0  | 0 | 0 | 0  | 0  | 4  |
| 'Erysipelotrichales | 'Erysipelotrichaceae | '_             | '_         | 0 | 0 | 0  | 0 | 0  | 0 | 0 | 7  | 0  | 0  |
| 'Clostridiales      | 'Ruminococcaceae     | 'Ruminococcus  | '_         | 0 | 0 | 0  | 0 | 0  | 0 | 0 | 0  | 0  | 7  |
| 'Pseudomonadales    | 'Moraxellaceae       | 'Psychrobacter | 'Other     | 3 | 0 | 0  | 0 | 0  | 0 | 3 | 0  | 0  | 0  |
| 'Bacillales         | 'Paenibacillaceae    | 'Other         | 'Other     | 0 | 0 | 6  | 0 | 0  | 0 | 0 | 0  | 0  | 0  |
| 'Clostridiales      | 'Lachnospiraceae     | 'Coprococcus   | '_         | 0 | 0 | 6  | 0 | 0  | 0 | 0 | 0  | 0  | 0  |
| 'Bacillales         | 'Bacillaceae         | 'Bacillus      | '_         | 0 | 0 | 0  | 0 | 6  | 0 | 0 | 0  | 0  | 0  |
| 'Lactobacillales    | 'Enterococcaceae     | 'Vagococcus    | '_         | 0 | 0 | 0  | 0 | 0  | 0 | 6 | 0  | 0  | 0  |
| 'RF39               | '_                   | '_             | '_         | 0 | 0 | 0  | 0 | 0  | 6 | 0 | 0  | 0  | 0  |
| 'Clostridiales      | 'Lachnospiraceae     | '_             | '_         | 0 | 0 | 0  | 0 | 0  | 0 | 0 | 6  | 0  | 0  |
| 'Clostridiales      | '_                   | '_             | '_         | 0 | 0 | 0  | 0 | 0  | 0 | 0 | 0  | 0  | 6  |
| 'RF39               | '_                   | '_             | '_         | 5 | 0 | 0  | 0 | 0  | 0 | 0 | 0  | 0  | 0  |
| 'Clostridiales      | '_                   | '_             | '_         | 0 | 0 | 0  | 0 | 0  | 0 | 0 | 0  | 5  | 0  |
| 'Clostridiales      | 'Ruminococcaceae     | 'Oscillospira  | '_         | 0 | 0 | 4  | 0 | 0  | 0 | 0 | 0  | 0  | 0  |
| 'RF39               | '_                   | '_             | '_         | 0 | 0 | 0  | 0 | 4  | 0 | 0 | 0  | 0  | 0  |
| 'Erysipelotrichales | 'Erysipelotrichaceae | '_             | '_         | 0 | 0 | 0  | 0 | 0  | 0 | 0 | 0  | 4  | 0  |

|                     |                      |                 |                |   |   |   |   |   |   |   |   |   |   |   |
|---------------------|----------------------|-----------------|----------------|---|---|---|---|---|---|---|---|---|---|---|
| 'Clostridiales      | 'Other               | 'Other          | 'Other         | 0 | 0 | 0 | 0 | 0 | 0 | 0 | 0 | 0 | 0 | 4 |
| 'Clostridiales      | 'Clostridiaceae      | 'Clostridium    | 'Other         | 3 | 0 | 0 | 0 | 0 | 0 | 0 | 0 | 0 | 0 | 0 |
| 'Clostridiales      | '_                   | '_              | '_             | 0 | 0 | 0 | 0 | 3 | 0 | 0 | 0 | 0 | 0 | 0 |
| 'Clostridiales      | 'Ruminococcaceae     | 'Butyricicoccus | 'pullicaecorum | 0 | 0 | 0 | 0 | 0 | 0 | 3 | 0 | 0 | 0 | 0 |
| 'Clostridiales      | 'Ruminococcaceae     | '_              | '_             | 0 | 0 | 0 | 0 | 0 | 0 | 0 | 0 | 3 | 0 | 0 |
| 'Deferribacterales  | 'Deferribacteraceae  | 'Mucispirillum  | 'schaedleri    | 0 | 0 | 0 | 3 | 0 | 0 | 0 | 0 | 0 | 0 | 0 |
| 'Turicibacterales   | 'Turicibacteraceae   | 'Turicibacter   | '_             | 0 | 0 | 0 | 0 | 0 | 0 | 0 | 3 | 0 | 0 | 0 |
| 'Clostridiales      | '_                   | '_              | '_             | 0 | 0 | 0 | 0 | 0 | 0 | 0 | 0 | 0 | 0 | 3 |
| 'Verrucomicrobiales | 'Verrucomicrobiaceae | 'Akkermansia    | 'muciniphila   | 2 | 0 | 0 | 0 | 0 | 0 | 0 | 0 | 0 | 0 | 0 |
| 'Clostridiales      | '[Mogibacteriaceae]  | '_              | '_             | 0 | 0 | 2 | 0 | 0 | 0 | 0 | 0 | 0 | 0 | 0 |
| 'Burkholderiales    | 'Alcaligenaceae      | 'Sutterella     | '_             | 0 | 0 | 0 | 0 | 0 | 0 | 2 | 0 | 0 | 0 | 0 |
| 'Clostridiales      | 'Lachnospiraceae     | 'Dorea          | 'longicatena   | 0 | 0 | 0 | 0 | 0 | 0 | 0 | 0 | 2 | 0 | 0 |
| 'Clostridiales      | 'Ruminococcaceae     | '_              | '_             | 0 | 0 | 0 | 2 | 0 | 0 | 0 | 0 | 0 | 0 | 0 |
| 'Clostridiales      | 'Lachnospiraceae     | '_              | '_             | 0 | 0 | 0 | 0 | 0 | 2 | 0 | 0 | 0 | 0 | 0 |
| 'Clostridiales      | '_                   | '_              | '_             | 0 | 0 | 0 | 0 | 0 | 0 | 0 | 0 | 0 | 0 | 2 |

Supplementary Table 2: Peak height of all the detected metabolite compounds after normalization

| S.No | Name of the Compound                | Gr.1 - Control |           |                   | Gr.2 -AFO-202 |           |                  | Gr. 3- N-163 |           |                  | Gr.4 - AFO-202+N-163 |           |                   | Telmisartan |           |                 |
|------|-------------------------------------|----------------|-----------|-------------------|---------------|-----------|------------------|--------------|-----------|------------------|----------------------|-----------|-------------------|-------------|-----------|-----------------|
|      |                                     | Pre            | Post      | Difference        | Pre           | Post      | Difference       | Pre          | Post      | Difference       | Pre                  | Post      | Difference        | Pre         | Post      | Difference      |
| 1    | 2-Aminobutyric acid-2TMS            | 16544.74       | 40209.97  | 23665.23          | 23704.19      | 27627.27  | 3923.08          | 11065.45     | 24994.24  | 13928.79         | 24652.04             | 39540.28  | 14888.24          | 25746.06    | 43700.57  | 17954.52        |
| 2    | 2-Hydroxyisobutyric acid-2TMS       | 36888.72       | 145407.17 | 108518.45         | 38444.81      | 146808.33 | 108363.52        | 70728.84     | 162704.66 | 91975.82         | 38044.04             | 179597.18 | 141553.15         | 36852.36    | 170732.73 | 133880.36       |
| 3    | 3-Aminoglutaric acid-3TMS           | 2064.63        | 11599.10  | 9534.47           | 2674.96       | 8297.81   | 5622.84          | 2061.59      | 4755.57   | 2693.99          | 4899.49              | 5638.95   | 739.46            | 3808.51     | 12436.04  | 8627.53         |
| 4    | 3-Hydroxybutyric acid-2TMS          | 78693.42       | 32663.28  | <b>-46030.14</b>  | 49425.90      | 15869.18  | <b>-33556.73</b> | 59399.24     | 16902.03  | <b>-42497.20</b> | 23465.34             | 16080.23  | <b>-7385.11</b>   | 15499.52    | 10891.34  | <b>-4608.17</b> |
| 5    | 3-Methyl-2-oxovaleric acid-meto-TMS | 2494.33        | 15765.26  | 13270.93          | 5771.05       | 12154.53  | 6383.48          | 3664.87      | 10069.54  | 6404.67          | 6043.01              | 13013.54  | 6970.53           | 7152.49     | 12393.37  | 5240.87         |
| 6    | 4-Hydroxyphenylacetic acid-2TMS     | 71212.24       | 90389.17  | 19176.93          | 38406.22      | 61406.95  | 23000.73         | 81498.41     | 108347.44 | 26849.04         | 29763.24             | 65944.94  | 36181.70          | 36067.25    | 39882.54  | 3815.29         |
| 7    | 5-Aminovaleric acid-3TMS            | 359981.32      | 177455.86 | <b>-182525.46</b> | 28606.18      | 220398.95 | 191792.77        | 184342.02    | 312636.97 | 128294.95        | 435424.34            | 319991.71 | <b>-115432.64</b> | 28517.91    | 292458.93 | 263941.02       |



|    |                               |            |            |                   |           |           |                  |            |            |                    |            |            |                  |           |            |                  |
|----|-------------------------------|------------|------------|-------------------|-----------|-----------|------------------|------------|------------|--------------------|------------|------------|------------------|-----------|------------|------------------|
| 8  | 5-Oxoproline-2TMS             | 86202.33   | 183221.07  | 97018.75          | 101052.25 | 142117.70 | 41065.45         | 76536.42   | 135748.92  | 59212.51           | 74316.31   | 137827.60  | 63511.29         | 113169.35 | 198991.94  | 85822.59         |
| 9  | Acetylglycine-TMS             | 62276.84   | 78877.14   | 16600.30          | 62217.09  | 75225.03  | 13007.93         | 54550.93   | 64278.24   | 9727.30            | 47481.52   | 68504.55   | 21023.03         | 70946.14  | 99435.23   | 28489.09         |
| 10 | Alanine-2TMS                  | 462486.71  | 932281.83  | 469795.13         | 575514.07 | 709299.17 | 133785.10        | 381431.60  | 576714.21  | 195282.60          | 451475.22  | 778523.96  | 327048.74        | 544032.57 | 1268525.27 | 724492.70        |
| 11 | Asparagine-3TMS               | 50264.14   | 47387.02   | <b>-2877.12</b>   | 52065.54  | 39742.05  | <b>-12323.49</b> | 45670.67   | 23805.15   | <b>-21865.52</b>   | 40462.65   | 35329.03   | <b>-5133.62</b>  | 57492.79  | 68357.27   | 10864.48         |
| 12 | Aspartic acid-3TMS            | 122316.67  | 309390.39  | 187073.73         | 168305.85 | 250489.61 | 82183.75         | 103731.51  | 227874.35  | 124142.84          | 133017.58  | 208828.93  | 75811.35         | 183416.60 | 433233.75  | 249817.15        |
| 13 | Fructose-meto-5TMS            | #####<br># | 999935.86  | <b>-726073.07</b> | 323320.36 | 936708.26 | 613387.90        | 2412757.75 | 1126616.20 | <b>-1286141.55</b> | 1689190.48 | 2733495.73 | 1044305.25       | 325202.45 | 1110939.22 | 785736.77        |
| 14 | Fucose-meto-4TMS              | 36824.30   | 44185.98   | 7361.68           | 57488.33  | 33927.51  | <b>-23560.83</b> | 58516.62   | 21689.03   | <b>-36827.59</b>   | 58635.69   | 53958.65   | <b>-4677.04</b>  | 89055.59  | 24027.13   | <b>-65028.47</b> |
| 15 | Galactose-meto-5TMS           | 92513.44   | 457335.67  | 364822.23         | 177745.54 | 661315.76 | 483570.22        | 191900.52  | 559295.50  | 367394.98          | 139909.99  | 1341594.81 | 1201684.82       | 359608.12 | 188781.00  | <b>170827.12</b> |
| 16 | Glucose-meto-5TMS             | 299911.54  | 1740399.37 | 1440487.83        | 842456.89 | 996893.55 | 154436.66        | 448031.24  | 1023564.45 | 575533.20          | 273170.40  | 1501256.09 | 1228085.70       | 400546.16 | 855701.34  | 455155.19        |
| 17 | Glutamic acid-3TMS            | 197256.75  | 658386.79  | 461130.05         | 264245.78 | 515323.80 | 251078.03        | 170970.32  | 416395.95  | 245425.63          | 269851.71  | 394663.22  | 124811.50        | 361041.65 | 743751.06  | 382709.41        |
| 18 | Glutamine-3TMS                | 60900.94   | 73851.25   | 12950.31          | 45289.87  | 46071.10  | 781.23           | 40503.29   | 47109.70   | 6606.41            | 27222.10   | 52375.70   | 25153.60         | 46899.14  | 77644.26   | 30745.13         |
| 19 | Glycerol-3TMS                 | 100045.16  | 512115.32  | 412070.17         | 193048.44 | 332266.25 | 139217.82        | 351596.87  | 290395.66  | <b>-61201.21</b>   | 124107.19  | 374822.76  | 250715.57        | 283873.86 | 324467.91  | 40594.06         |
| 20 | Glycine-3TMS                  | 175941.04  | 190667.24  | 14726.20          | 182268.66 | 182802.22 | 533.56           | 118303.95  | 134185.05  | 15881.10           | 148645.59  | 111069.96  | <b>-37575.63</b> | 179124.85 | 288456.14  | 109331.29        |
| 21 | Hypoxanthine-2TMS             | 18209.77   | 73610.39   | 55400.63          | 25970.42  | 54650.62  | 28680.21         | 23749.72   | 48430.05   | 24680.32           | 22627.37   | 60014.19   | 37386.83         | 33144.25  | 56824.97   | 23680.72         |
| 22 | Inosine-4TMS                  | 20341.44   | 29963.22   | 9621.79           | 27134.09  | 52940.46  | 25806.38         | 27591.81   | 56079.56   | 28487.75           | 33777.00   | 42475.35   | 8698.35          | 24548.88  | 37226.82   | 12677.95         |
| 23 | Isoleucine-2TMS               | 240751.69  | 255679.87  | 14928.19          | 213617.13 | 185078.81 | <b>-28538.33</b> | 142467.71  | 156224.53  | 13756.81           | 140230.24  | 158650.59  | 18420.35         | 175687.57 | 381173.16  | 205485.59        |
| 24 | Lactic acid-2TMS              | 126966.77  | 174366.10  | 47399.33          | 161320.99 | 112769.78 | <b>-48551.21</b> | 181299.93  | 76773.16   | <b>-104526.77</b>  | 52406.61   | 197790.91  | 145384.31        | 71969.55  | 36363.66   | <b>35605.88</b>  |
| 25 | Leucine-2TMS                  | 405177.22  | 484969.86  | 79792.64          | 381285.89 | 366743.37 | <b>-14542.52</b> | 297859.97  | 296018.19  | <b>-1841.78</b>    | 273676.66  | 287240.08  | 13563.42         | 364222.50 | 631954.96  | 267732.46        |
| 26 | Lysine-4TMS                   | 453167.29  | 1042910.27 | 589742.97         | 578069.23 | 771280.17 | 193210.94        | 495585.73  | 790010.41  | 294424.68          | 505753.28  | 831999.15  | 326245.87        | 592034.86 | 952876.14  | 360841.28        |
| 27 | Malic acid-3TMS               | 15431.92   | 50833.82   | 35401.90          | 18557.13  | 136072.04 | 117514.91        | 23517.14   | 116959.69  | 93442.55           | 25340.81   | 67836.64   | 42495.84         | 54899.38  | 38544.73   | <b>16354.66</b>  |
| 28 | Mannose-meto-5TMS             | 46604.74   | 101647.05  | 55042.30          | 58090.57  | 125118.62 | 67028.06         | 70844.17   | 147959.66  | 77115.49           | 45441.01   | 167518.11  | 122077.10        | 79951.11  | 65364.10   | <b>14587.00</b>  |
| 29 | Methionine-2TMS               | 72809.85   | 128516.84  | 55706.99          | 84612.94  | 90620.86  | 6007.93          | 66116.46   | 88928.83   | 22812.37           | 68604.44   | 92418.75   | 23814.31         | 103825.98 | 168797.44  | 64971.46         |
| 30 | N-Acetylmannosamine-meto-4TMS | 51349.02   | 194543.70  | 143194.68         | 95958.86  | 210636.96 | 114678.10        | 102946.69  | 130222.12  | 27275.43           | 102728.94  | 270379.17  | 167650.23        | 207515.87 | 90678.54   | <b>116837.33</b> |
| 31 | Nicotinic acid-TMS            | 8270.56    | 31967.10   | 23696.54          | 12163.20  | 23936.48  | 11773.28         | 11141.64   | 22880.62   | 11738.98           | 12707.43   | 23489.75   | 10782.32         | 18359.32  | 23826.50   | 5467.18          |
| 32 | Norvaline-TMS                 | 94923.32   | 100191.34  | 5268.03           | 82912.31  | 73583.61  | <b>-9328.70</b>  | 58328.64   | 66992.36   | 8663.72            | 54802.10   | 77669.25   | 22867.15         | 72621.50  | 110365.67  | 37744.18         |
| 33 | Ornithine-4TMS                | 45698.47   | 101711.56  | 56013.10          | 40654.29  | 52324.86  | 11670.57         | 52234.33   | 56216.15   | 3981.82            | 54989.59   | 101736.85  | 46747.26         | 44496.80  | 62226.84   | 17730.04         |
| 34 | Phenylalanine-2TMS            | 173673.02  | 290028.18  | 116355.17         | 186236.03 | 228284.46 | 42048.43         | 161361.25  | 202463.07  | 41101.82           | 145354.48  | 179722.22  | 34367.74         | 208441.78 | 342996.16  | 134554.38        |

|    |                       |           |           |                   |           |            |                  |           |            |                  |           |           |                  |           |           |                 |
|----|-----------------------|-----------|-----------|-------------------|-----------|------------|------------------|-----------|------------|------------------|-----------|-----------|------------------|-----------|-----------|-----------------|
| 35 | Phosphoric acid-3TMS  | 13703.35  | 692470.05 | 678766.69         | 55467.68  | 765279.47  | 709811.79        | 39524.43  | 1030958.21 | 991433.78        | 51518.47  | 879380.28 | 827861.80        | 107073.44 | 122301.92 | 15228.48        |
| 36 | Proline-2TMS          | 57195.44  | 92021.21  | 34825.77          | 77037.72  | 103324.97  | 26287.25         | 60257.37  | 83664.37   | 23407.00         | 66855.91  | 53963.25  | <b>-12892.66</b> | 98386.02  | 151136.53 | 52750.51        |
| 37 | Putrescine-4TMS       | 90940.03  | 4806.17   | <b>-86133.86</b>  | 30410.15  | 5030.93    | <b>-25379.22</b> | 70539.24  | 6011.09    | <b>-64528.14</b> | 62824.68  | 9891.53   | <b>-52933.15</b> | 21749.83  | 6122.91   | <b>15626.91</b> |
| 38 | Pyruvic acid-meto-TMS | 31557.87  | 108630.52 | 77072.65          | 40255.26  | 105996.98  | 65741.72         | 52793.70  | 107097.52  | 54303.82         | 40456.18  | 121792.59 | 81336.41         | 41703.69  | 116493.60 | 74789.91        |
| 39 | Ribonic acid-5TMS     | 90115.51  | 64726.74  | -25388.76         | 85151.16  | 66560.71   | -18590.46        | 90412.13  | 99956.38   | 9544.25          | 93736.17  | 93030.85  | <b>-705.32</b>   | 95701.95  | 64707.65  | -30994.30       |
| 40 | Ribose-meto-4TMS      | 199285.35 | 806414.91 | 607129.56         | 321848.24 | 706173.47  | 384325.23        | 284999.93 | 561917.45  | 276917.52        | 289686.98 | 526890.91 | 237203.94        | 510635.39 | 699650.70 | 189015.32       |
| 41 | Serine-3TMS           | 134100.10 | 150072.29 | 15972.19          | 134521.62 | 135009.56  | 487.94           | 94829.48  | 89019.26   | -5810.21         | 87612.04  | 97022.85  | 9410.81          | 124526.34 | 206603.74 | 82077.40        |
| 42 | Spermidine-5TMS       | 11571.79  | 14335.92  | 2764.13           | 8257.93   | 7462.86    | <b>-795.07</b>   | 10699.82  | 7443.06    | <b>-3256.75</b>  | 10274.90  | 8775.14   | <b>-1499.76</b>  | 9612.74   | 8122.10   | <b>-1490.65</b> |
| 43 | Succinic acid-2TMS    | 200720.47 | 75253.68  | <b>-125466.79</b> | 32921.32  | 1398291.07 | 1365369.75       | 383811.07 | 1183826.74 | 800015.68        | 44403.33  | 504988.19 | 460584.87        | 263097.91 | 313904.61 | 50806.69        |
| 44 | Taurine-3TMS          | 15049.13  | 66033.11  | 50983.98          | 14685.18  | 46705.91   | 32020.73         | 11165.27  | 32313.06   | 21147.79         | 14449.38  | 55683.04  | 41233.65         | 14857.44  | 24726.77  | 9869.33         |
| 45 | Threonine-3TMS        | 137361.71 | 175385.78 | 38024.08          | 137475.15 | 135608.93  | <b>-1866.22</b>  | 91893.96  | 113191.42  | 21297.46         | 87758.08  | 115202.12 | 27444.04         | 122185.79 | 240869.77 | 118683.98       |
| 46 | Thymine-2TMS          | 5319.57   | 16561.64  | 11242.07          | 6636.79   | 13272.69   | 6635.90          | 6900.32   | 9466.94    | 2566.62          | 9972.14   | 17972.30  | 8000.16          | 12893.64  | 7133.20   | <b>-5760.44</b> |
| 47 | Tryptophan-3TMS       | 21044.89  | 20895.79  | <b>-149.10</b>    | 17365.35  | 18254.73   | 889.38           | 13733.63  | 17318.66   | 3585.03          | 14840.33  | 14286.41  | <b>-553.92</b>   | 16169.30  | 28678.00  | 12508.70        |
| 48 | Tyrosine-3TMS         | 273469.68 | 438287.99 | 164818.32         | 293828.48 | 351487.07  | 57658.59         | 234275.64 | 316786.47  | 82510.82         | 232207.59 | 363478.28 | 131270.69        | 309190.46 | 425825.94 | 116635.49       |
| 49 | Uracil-2TMS           | 25078.62  | 92837.69  | 67759.07          | 44546.07  | 84845.85   | 40299.79         | 35546.66  | 66320.55   | 30773.89         | 50653.91  | 65823.53  | 15169.62         | 74843.38  | 71567.16  | <b>-3276.22</b> |
| 50 | Valine-2TMS           | 353165.15 | 405846.51 | 52681.36          | 290698.34 | 255449.25  | <b>-35249.08</b> | 219247.47 | 233471.87  | 14224.40         | 202562.77 | 238231.09 | 35668.32         | 254032.97 | 521841.20 | 267808.23       |
| 51 | Xanthine-3TMS         | 53777.98  | 130586.54 | 76808.56          | 79540.73  | 113793.80  | 34253.08         | 83412.44  | 89448.75   | 6036.32          | 71847.21  | 109146.53 | 37299.32         | 101684.60 | 103194.40 | 1509.80         |
| 52 | Xylose-meto-4TMS      | 174559.36 | 290187.08 | 115627.72         | 186404.46 | 228374.90  | 41970.44         | 162359.78 | 202528.45  | 40168.67         | 145455.14 | 179768.76 | 34313.61         | 208574.29 | 343176.94 | 134602.65       |

**Supplementary Table 3:** Coefficients of Metabolite compounds with a VIP value of 1 or higher in OPLS-DA in the different groups

| No. | Metabolites          | Coefficients |           |           |               |             |
|-----|----------------------|--------------|-----------|-----------|---------------|-------------|
|     |                      | Control      | AFO-202   | N-163     | AFO-202+N-163 | Telmisartan |
| 1   | Glucose-meto-5TMS    | -0.000180    | -0.000091 | -0.000151 | -0.000168     | -0.000139   |
| 2   | Fructose-meto-5TMS   | 0.000133     | -0.000173 | 0.000215  | -0.000177     | -0.000209   |
| 3   | Phosphoric acid-3TMS | -0.000125    |           |           |               |             |
| 4   | Ribose-meto-4TMS     | -0.000116    | -0.000132 | -0.000103 | -0.000065     | -0.000083   |

|    |                               |           |           |           |           |           |
|----|-------------------------------|-----------|-----------|-----------|-----------|-----------|
| 5  | Lysine-4TMS                   | -0.000116 | -0.000083 | -0.000098 | -0.000069 | -0.000120 |
| 6  | Alanine-2TMS                  | -0.000109 | -0.000003 | -0.000061 | -0.000094 | -0.000171 |
| 7  | Glutamic acid-3TMS            | -0.000100 | -0.000101 | -0.000102 | -0.000063 | -0.000149 |
| 8  | Glycerol-3TMS                 | -0.000102 | -0.000080 |           | -0.000084 |           |
| 9  | Galactose-meto-5TMS           | -0.000092 | -0.000144 | -0.000124 | -0.000190 | 0.000094  |
| 10 | Aspartic acid-3TMS            | -0.000063 | -0.000061 | -0.000064 |           | -0.000113 |
| 11 | 5-Aminovaleric acid-3TMS      | 0.000069  | -0.000103 | -0.000077 | 0.000073  | -0.000123 |
| 12 | Tyrosine-3TMS                 | -0.000064 |           | -0.000039 | -0.000057 | -0.000043 |
| 13 | N-Acetylmannosamine-meto-4TMS | -0.000055 | -0.000068 |           | -0.000058 |           |
| 14 | Succinic acid-2TMS            | 0.000059  | -0.000259 | -0.000172 | -0.000109 |           |
| 15 | Phenylalanine-2TMS            | -0.000049 |           |           |           | -0.000087 |
| 16 | Xylose-meto-4TMS              | -0.000048 |           |           |           | -0.000087 |
| 17 | 2-Hydroxyisobutyric acid-2TMS | -0.000054 | -0.000072 | -0.000064 | -0.000061 | -0.000072 |
| 18 | 5-Oxoproline-2TMS             | -0.000043 |           |           |           |           |
| 19 | Phosphoric acid-3TMS          |           | -0.000197 | -0.000198 | -0.000144 |           |
| 20 | Malic acid-3TMS               |           | -0.000077 | -0.000058 |           |           |
| 21 | Mannose-meto-5TMS             |           | -0.000057 | -0.000055 | -0.000063 |           |
| 22 | Pyruvic acid-meto-TMS         |           | -0.000065 |           |           | -0.000046 |

|    |                   |  |  |          |           |           |
|----|-------------------|--|--|----------|-----------|-----------|
| 23 | Lactic acid-2TMS  |  |  | 0.000062 | -0.000062 |           |
| 24 | Valine-2TMS       |  |  |          |           | -0.000075 |
| 25 | Leucine-2TMS      |  |  |          |           | -0.000087 |
| 26 | Isoleucine-2TMS   |  |  |          |           | -0.000083 |
| 27 | Threonine-3TMS    |  |  |          |           | -0.000080 |
| 28 | Glycine-3TMS      |  |  |          |           | -0.000058 |
| 29 | 5-Oxoproline-2TMS |  |  |          |           | -0.000064 |
| 30 | Serine-3TMS       |  |  |          |           | -0.000065 |
