# Supplementary figures and images for: Two unique biological response-modifier glucans beneficially regulating gut microbiota and faecal metabolome in a non-alcoholic steatohepatitis animal model, with potential applications in human health and disease
Source: PubMed Central journal article supplement — BMJ Open Gastroenterol. 2022 Sep 27;9(1):e000985. doi: 10.1136/bmjgast-2022-000985 (PMC9516208; doi:10.1136/bmjgast-2022-000985), 2022-09-27

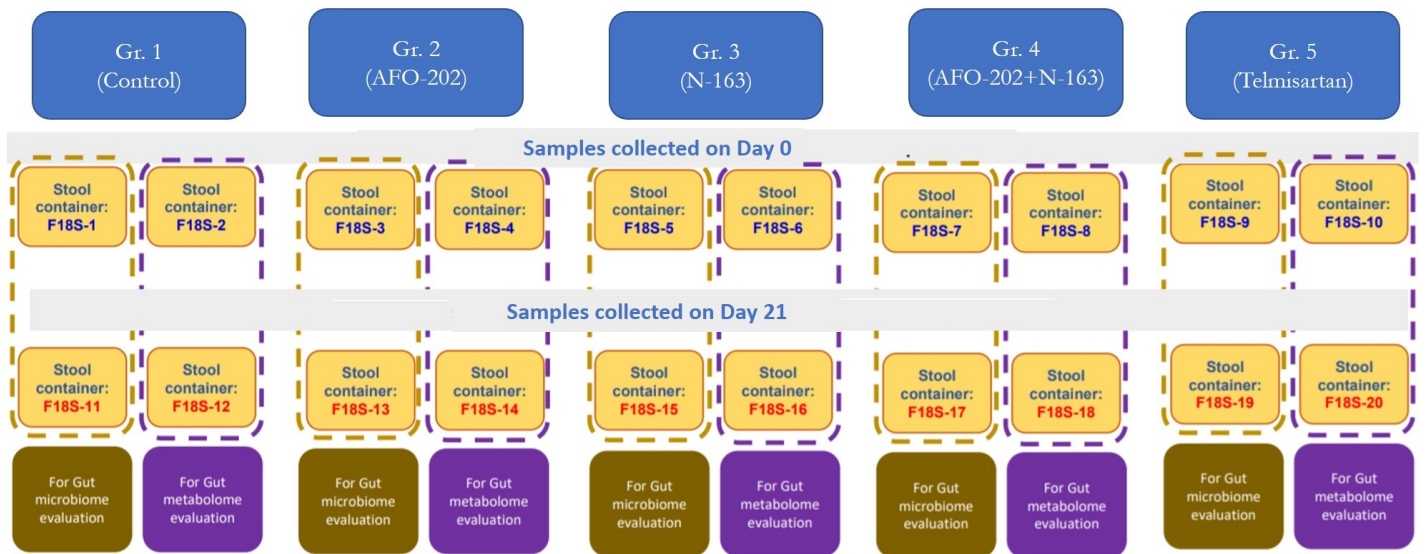

Supplement: bmjgast-2022-000985supp001.pdf [file bmjgast-2022-000985supp001.pdf]

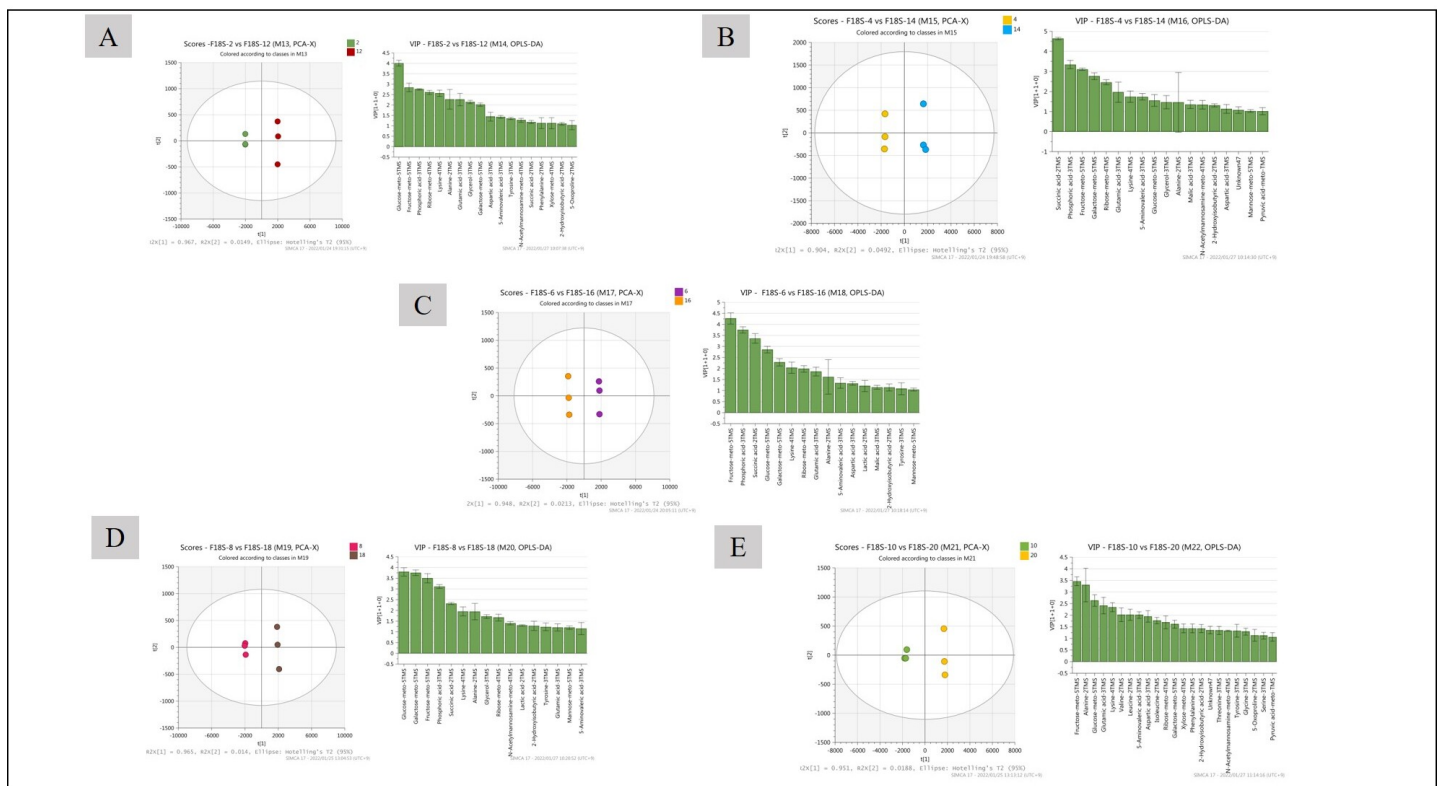

Supplement: bmjgast-2022-000985supp004.pdf [file bmjgast-2022-000985supp004.pdf]
